# Supplementary material for: Human Papillomavirus 42 Drives Digital Papillary Adenocarcinoma and Elicits a Germ Cell–like Program Conserved in HPV-Positive Cancers
Source: Cancer Discov. 2022 Oct 10;13(1):70–84. doi: 10.1158/2159-8290.CD-22-0489 (PMC9827110; doi:10.1158/2159-8290.CD-22-0489)
Supplement: Supplementary Table S2 — Viral abundance scores in ViroCap assay. [file cd-22-0489_supplementary_table_s2_suppst2.xlsx]

## Sheet: Supplementary Table S2
Supplementary Table S2: Viral abundance score in ViroCap DNA-/RNA-seq
Sample ID	Isolate	Viral Species	Centrifuge Abundance Score
#182	DNA	Human Papillomavirus 42 (HPV42), complete genome	0.998814
#179	DNA	Human Papillomavirus 42 (HPV42), complete genome	0.997524
#180	DNA	Human Papillomavirus 42 (HPV42), complete genome	0.993453
#185	DNA	Human Papillomavirus 42 (HPV42), complete genome	0.986083
#191	DNA	Human Papillomavirus 42 (HPV42), complete genome	0.985068
#170	DNA	Human Papillomavirus 42 (HPV42), complete genome	0.984433
#171	DNA	Human Papillomavirus 42 (HPV42), complete genome	0.966541
#168	DNA	Human Papillomavirus 42 (HPV42), complete genome	0.964235
#173	DNA	Human Papillomavirus 42 (HPV42), complete genome	0.963102
#184	DNA	Human Papillomavirus 42 (HPV42), complete genome	0.910051
#188	DNA	Human Papillomavirus 42 (HPV42), complete genome	0.793754
#178	DNA	Human Papillomavirus 42 (HPV42), complete genome	0.768106
#169	DNA	Human Papillomavirus 42 (HPV42), complete genome	0.587979
#181	DNA	Human Papillomavirus 42 (HPV42), complete genome	0.255909
#176	DNA	XMRV complete proviral genome, isolate S-162 {SQ 335-446}	0.235773
#177	DNA	XMRV complete proviral genome, isolate S-162 {SQ 335-446}	0.224294
#176	DNA	DG-75 Murine leukemia virus, complete genome {SQ 11-2267}	0.186647
#181	DNA	XMRV complete proviral genome, isolate S-162 {SQ 335-446}	0.179919
#177	DNA	DG-75 Murine leukemia virus, complete genome {SQ 11-2267}	0.16042
#181	DNA	DG-75 Murine leukemia virus, complete genome {SQ 11-2267}	0.159475
#177	DNA	Human Papillomavirus 42 (HPV42), complete genome	0.152509
#176	DNA	Moloney murine leukemia virus, complete genome	0.13222
#169	DNA	XMRV complete proviral genome, isolate S-162 {SQ 335-446}	0.117602
#176	DNA	Human Papillomavirus 42 (HPV42), complete genome	0.11157
#181	DNA	Moloney murine leukemia virus, complete genome	0.107678
#177	DNA	Moloney murine leukemia virus, complete genome	0.0977738
#169	DNA	DG-75 Murine leukemia virus, complete genome {SQ 11-2267}	0.0795993
#176	DNA	MLU13766 Murine leukemia virus MCF1233, complete genome {SQ 7-2854}	0.073612
#181	DNA	MLU13766 Murine leukemia virus MCF1233, complete genome {SQ 7-2854}	0.0674714
#177	DNA	MLU13766 Murine leukemia virus MCF1233, complete genome {SQ 7-2854}	0.0638953
#177	DNA	Rauscher murine leukemia virus, complete genome	0.0602994
#169	DNA	Moloney murine leukemia virus, complete genome	0.0576509
#178	DNA	XMRV complete proviral genome, isolate S-162 {SQ 335-446}	0.053349
#188	DNA	XMRV complete proviral genome, isolate S-162 {SQ 335-446}	0.0494624
#181	DNA	Rauscher murine leukemia virus, complete genome	0.0481454
#176	DNA	Rauscher murine leukemia virus, complete genome	0.0459746
#176	DNA	Murine type C retrovirus, complete genome	0.0424277
#169	DNA	MLU13766 Murine leukemia virus MCF1233, complete genome {SQ 7-2854}	0.0391939
#177	DNA	Murine leukemia virus isolate NeRV, complete genome {SQ 22-2311}	0.0385936
#188	DNA	DG-75 Murine leukemia virus, complete genome {SQ 11-2267}	0.0379846
#181	DNA	Murine type C retrovirus, complete genome	0.0375251
#177	DNA	Xenotropic MuLV-related virus isolate xmlv15, complete genome {SQ 51-542}	0.0366547
#177	DNA	Murine type C retrovirus, complete genome	0.0327936
#176	DNA	Xenotropic MuLV-related virus isolate xmlv15, complete genome {SQ 51-542}	0.0307911
#176	DNA	Murine leukemia virus isolate NeRV, complete genome {SQ 22-2311}	0.0304825
#178	DNA	DG-75 Murine leukemia virus, complete genome {SQ 11-2267}	0.0301868
#181	DNA	Xenotropic MuLV-related virus isolate xmlv15, complete genome {SQ 51-542}	0.0268499
#181	DNA	Murine leukemia virus isolate NeRV, complete genome {SQ 22-2311}	0.0262884
#176	DNA	Xenotropic murine leukemia virus isolate VCaP, complete genome {SQ 1-2700}	0.026135
#181	DNA	Xenotropic murine leukemia virus isolate VCaP, complete genome {SQ 1-2700}	0.0257398
#169	DNA	Rauscher murine leukemia virus, complete genome	0.0253689
#178	DNA	Moloney murine leukemia virus, complete genome	0.0242905
#188	DNA	Moloney murine leukemia virus, complete genome	0.0234474
#177	DNA	Xenotropic murine leukemia virus isolate VCaP, complete genome {SQ 1-2700}	0.0222234
#178	DNA	MLU13766 Murine leukemia virus MCF1233, complete genome {SQ 7-2854}	0.0213324
#184	DNA	XMRV complete proviral genome, isolate S-162 {SQ 335-446}	0.0211789
#178	DNA	Human papillomavirus - 18, complete genome	0.0208049
#178	DNA	Rauscher murine leukemia virus, complete genome	0.0205464
#184	DNA	DG-75 Murine leukemia virus, complete genome {SQ 11-2267}	0.0187073
#169	DNA	Murine type C retrovirus, complete genome	0.0182405
#177	DNA	XMRV-like mouse endogenous retrovirus mERV-XL, complete sequence {SQ 58-1357}	0.0179717
#177	DNA	Human papillomavirus - 18, complete genome	0.0165239
#176	DNA	Murine osteosarcoma virus, complete genome	0.015221
#188	DNA	MLU13766 Murine leukemia virus MCF1233, complete genome {SQ 7-2854}	0.0150135
#176	DNA	XMRV-like mouse endogenous retrovirus mERV-XL, complete sequence {SQ 58-1357}	0.014988
#177	DNA	Semliki forest virus genomic RNA for non-structural polyprotein and structural polyprotein, strain A7 {SQ 2296-2490}	0.0149369
#169	DNA	Xenotropic MuLV-related virus isolate xmlv15, complete genome {SQ 51-542}	0.0148116
#181	DNA	Murine osteosarcoma virus, complete genome	0.0145946
#181	DNA	XMRV-like mouse endogenous retrovirus mERV-XL, complete sequence {SQ 58-1357}	0.0138685
#169	DNA	Murine leukemia virus isolate NeRV, complete genome {SQ 22-2311}	0.013027
#169	DNA	Xenotropic murine leukemia virus isolate VCaP, complete genome {SQ 1-2700}	0.0123799
#188	DNA	Rauscher murine leukemia virus, complete genome	0.0115233
#188	DNA	Xenotropic MuLV-related virus isolate xmlv15, complete genome {SQ 51-542}	0.0108768
#178	DNA	Murine type C retrovirus, complete genome	0.0108364
#177	DNA	Murine leukemia virus SL3-3, complete genome {SQ 22-2306}	0.0106588
#188	DNA	Murine type C retrovirus, complete genome	0.0101842
#168	RNA	Human adenovirus C, complete genome	0.0446633
#168	RNA	Moloney murine sarcoma virus, complete genome	0.0185013
#168	RNA	Human immunodeficiency virus 1, complete genome	0.207539
#168	RNA	Sequence 3 from Patent WO0200883 {SQ 1-2287}	0.017911
#168	RNA	Semliki forest virus genomic RNA for non-structural polyprotein and structural polyprotein, strain A7 {SQ 2296-2490}	0.269927
#168	RNA	Human Papillomavirus 42 (HPV42), complete genome	0.416821
#169	RNA	DG-75 Murine leukemia virus, complete genome {SQ 11-2267}	0.0293886
#169	RNA	Xenotropic MuLV-related virus isolate xmlv15, complete genome {SQ 51-542}	0.0134744
#169	RNA	Human Papillomavirus 42 (HPV42), complete genome	0.916068
#170	RNA	Semliki forest virus genomic RNA for non-structural polyprotein and structural polyprotein, strain A7 {SQ 2296-2490}	0.431649
#170	RNA	Human Papillomavirus 42 (HPV42), complete genome	0.537958
#171	RNA	Human adenovirus C, complete genome	0.0113668
#171	RNA	Simian virus 40, complete genome	0.011361
#171	RNA	Human immunodeficiency virus 1, complete genome	0.447278
#171	RNA	Sequence 3 from Patent WO0200883 {SQ 1-2287}	0.0480871
#171	RNA	Semliki forest virus genomic RNA for non-structural polyprotein and structural polyprotein, strain A7 {SQ 2296-2490}	0.406992
#171	RNA	Sequence 11 from Patent WO2006008074 {SQ 1-2006}	0.0165167
#171	RNA	Human Papillomavirus 42 (HPV42), complete genome	0.0366431
#173	RNA	Human immunodeficiency virus 1, complete genome	0.0324863
#173	RNA	DG-75 Murine leukemia virus, complete genome {SQ 11-2267}	0.0144286
#173	RNA	Semliki forest virus genomic RNA for non-structural polyprotein and structural polyprotein, strain A7 {SQ 2296-2490}	0.112502
#173	RNA	Xenotropic MuLV-related virus isolate xmlv15, complete genome {SQ 51-542}	0.0151655
#173	RNA	Human Papillomavirus 42 (HPV42), complete genome	0.807637
#176	RNA	Human immunodeficiency virus 1, complete genome	0.0184428
#176	RNA	Sequence 3 from Patent WO0200883 {SQ 1-2287}	0.031103
#176	RNA	Semliki forest virus genomic RNA for non-structural polyprotein and structural polyprotein, strain A7 {SQ 2296-2490}	0.182684
#176	RNA	Human Papillomavirus 42 (HPV42), complete genome	0.754427
#177	RNA	Encephalomyocarditis virus, complete genome	0.0104477
#177	RNA	Human immunodeficiency virus 1, complete genome	0.449561
#177	RNA	Sequence 3 from Patent WO0200883 {SQ 1-2287}	0.031914
#177	RNA	{SQ 6137-6267}	0.0132374
#177	RNA	Semliki forest virus genomic RNA for non-structural polyprotein and structural polyprotein, strain A7 {SQ 2296-2490}	0.466365
#178	RNA	Human adenovirus C, complete genome	0.0177997
#178	RNA	Sequence 3 from Patent WO0200883 {SQ 1-2287}	0.0979226
#178	RNA	Semliki forest virus genomic RNA for non-structural polyprotein and structural polyprotein, strain A7 {SQ 2296-2490}	0.442461
#178	RNA	Human Papillomavirus 42 (HPV42), complete genome	0.436614
#179	RNA	Human immunodeficiency virus 1, complete genome	0.0954951
#179	RNA	Semliki forest virus genomic RNA for non-structural polyprotein and structural polyprotein, strain A7 {SQ 2296-2490}	0.212786
#179	RNA	Human Papillomavirus 42 (HPV42), complete genome	0.665763
#180	RNA	Moloney murine sarcoma virus, complete genome	0.0211608
#180	RNA	Human immunodeficiency virus 1, complete genome	0.523415
#180	RNA	Sequence 3 from Patent WO0200883 {SQ 1-2287}	0.0479539
#180	RNA	Semliki forest virus genomic RNA for non-structural polyprotein and structural polyprotein, strain A7 {SQ 2296-2490}	0.344127
#180	RNA	Human Papillomavirus 42 (HPV42), complete genome	0.0514821
#181	RNA	Human adenovirus C, complete genome	0.0116588
#181	RNA	Human papillomavirus type 4, complete genome	0.0163273
#181	RNA	Abelson murine leukemia virus, complete genome	0.0227719
#181	RNA	Human immunodeficiency virus 1, complete genome	0.389612
#181	RNA	Sequence 3 from Patent WO0200883 {SQ 1-2287}	0.0321008
#181	RNA	Semliki forest virus genomic RNA for non-structural polyprotein and structural polyprotein, strain A7 {SQ 2296-2490}	0.511456
#182	RNA	Human Papillomavirus 42 (HPV42), complete genome	0.991469
#184	RNA	Semliki forest virus genomic RNA for non-structural polyprotein and structural polyprotein, strain A7 {SQ 2296-2490}	0.0943923
#184	RNA	Human Papillomavirus 42 (HPV42), complete genome	0.886859
#185	RNA	Human Papillomavirus 42 (HPV42), complete genome	0.985616
#186	RNA	Human adenovirus C, complete genome	0.016157
#186	RNA	Avian leukosis virus - RSA, complete genome	0.0187133
#186	RNA	Human immunodeficiency virus 1, complete genome	0.101251
#186	RNA	Sequence 3 from Patent WO0200883 {SQ 1-2287}	0.112927
#186	RNA	Semliki forest virus genomic RNA for non-structural polyprotein and structural polyprotein, strain A7 {SQ 2296-2490}	0.709097
#186	RNA	Xenotropic MuLV-related virus isolate xmlv15, complete genome {SQ 51-542}	0.0104046
#186	RNA	{SQ 49914-50091}	0.0106802
#188	RNA	Semliki forest virus genomic RNA for non-structural polyprotein and structural polyprotein, strain A7 {SQ 2296-2490}	0.0686264
#188	RNA	Human Papillomavirus 42 (HPV42), complete genome	0.908542
