# Supplementary material for: Human Papillomavirus 42 Drives Digital Papillary Adenocarcinoma and Elicits a Germ Cell–like Program Conserved in HPV-Positive Cancers
Source: Cancer Discov. 2022 Oct 10;13(1):70–84. doi: 10.1158/2159-8290.CD-22-0489 (PMC9827110; doi:10.1158/2159-8290.CD-22-0489)
Supplement: Supplementary Table S5 — FISH probes. [file cd-22-0489_supplementary_table_s5_suppst5.xlsx]

## Sheet: Supplementary Table S5
Supplementary Table S5: FISH probes
Target locus	Primary oligonucleotides	Linker bases	Secondary oligonucleotide handle	Synthesized primary oligonucleotides
HPV42	AAAATAAGGGAGTAACCGAATTCGGTTCAACCGAAACCG	TT	CACACGCTCTTCCGTTCTATGCGACGTCGGTG	AAAATAAGGGAGTAACCGAATTCGGTTCAACCGAAACCGTTCACACGCTCTTCCGTTCTATGCGACGTCGGTG
HPV42	ACATATATAAACCACCCAAAGTAGTGGTCCCAGTTAAGGCA	TT	CACACGCTCTTCCGTTCTATGCGACGTCGGTG	ACATATATAAACCACCCAAAGTAGTGGTCCCAGTTAAGGCATTCACACGCTCTTCCGTTCTATGCGACGTCGGTG
HPV42	ATGTCAGGTACATCTGCCTCATCACAGCCACGCACATTA	TT	CACACGCTCTTCCGTTCTATGCGACGTCGGTG	ATGTCAGGTACATCTGCCTCATCACAGCCACGCACATTATTCACACGCTCTTCCGTTCTATGCGACGTCGGTG
HPV42	CCAATTGTGTAAGGAATTTGGGCTGACATTGCGGAA	TT	CACACGCTCTTCCGTTCTATGCGACGTCGGTG	CCAATTGTGTAAGGAATTTGGGCTGACATTGCGGAATTCACACGCTCTTCCGTTCTATGCGACGTCGGTG
HPV42	ACTTAACAGGCGCAGAGGTGCTCGCGTACCATTTTA	TT	CACACGCTCTTCCGTTCTATGCGACGTCGGTG	ACTTAACAGGCGCAGAGGTGCTCGCGTACCATTTTATTCACACGCTCTTCCGTTCTATGCGACGTCGGTG
HPV42	GATTTGGTAGTGGTGTGGAGGAAGGACTTTCCATATGC	TT	CACACGCTCTTCCGTTCTATGCGACGTCGGTG	GATTTGGTAGTGGTGTGGAGGAAGGACTTTCCATATGCTTCACACGCTCTTCCGTTCTATGCGACGTCGGTG
HPV42	ATTCTAAAATTTGTGCACTGCGACACTACGAAAGATCAGC	TT	CACACGCTCTTCCGTTCTATGCGACGTCGGTG	ATTCTAAAATTTGTGCACTGCGACACTACGAAAGATCAGCTTCACACGCTCTTCCGTTCTATGCGACGTCGGTG
HPV42	TAGAAGAACAACAAATTAGATGTGCCTTGTGTCAAAAGCCGT	TT	CACACGCTCTTCCGTTCTATGCGACGTCGGTG	TAGAAGAACAACAAATTAGATGTGCCTTGTGTCAAAAGCCGTTTCACACGCTCTTCCGTTCTATGCGACGTCGGTG
HPV42	GTACAAGATTTCAATTTATATTGTGTCAGTGGACGGGTCGGT	TT	CACACGCTCTTCCGTTCTATGCGACGTCGGTG	GTACAAGATTTCAATTTATATTGTGTCAGTGGACGGGTCGGTTTCACACGCTCTTCCGTTCTATGCGACGTCGGTG
HPV42	AGAGGACAATGCGTGGAGAGACGCCTACCCTAAAGG	TT	CACACGCTCTTCCGTTCTATGCGACGTCGGTG	AGAGGACAATGCGTGGAGAGACGCCTACCCTAAAGGTTCACACGCTCTTCCGTTCTATGCGACGTCGGTG
HPV42	ATTGTTTTGTTTGACATACCAACGTGTGAGACACCCATTG	TT	CACACGCTCTTCCGTTCTATGCGACGTCGGTG	ATTGTTTTGTTTGACATACCAACGTGTGAGACACCCATTGTTCACACGCTCTTCCGTTCTATGCGACGTCGGTG
HPV42	TGCTATGAACAATTGGACAGCTCAGATGAAGATGACCA	TT	CACACGCTCTTCCGTTCTATGCGACGTCGGTG	TGCTATGAACAATTGGACAGCTCAGATGAAGATGACCATTCACACGCTCTTCCGTTCTATGCGACGTCGGTG
HPV42	CCAAACAGGACATACAGCGTTACAGAATACTGTGTGTGT	TT	CACACGCTCTTCCGTTCTATGCGACGTCGGTG	CCAAACAGGACATACAGCGTTACAGAATACTGTGTGTGTTTCACACGCTCTTCCGTTCTATGCGACGTCGGTG
HPV42	ACACAGTGTTACAAGTCTGTTAAACTCGTTGTGCAGTGT	TT	CACACGCTCTTCCGTTCTATGCGACGTCGGTG	ACACAGTGTTACAAGTCTGTTAAACTCGTTGTGCAGTGTTTCACACGCTCTTCCGTTCTATGCGACGTCGGTG
HPV42	AGAGGCGGACATAAGAAACCTGCAACAGATGCTTTT	TT	CACACGCTCTTCCGTTCTATGCGACGTCGGTG	AGAGGCGGACATAAGAAACCTGCAACAGATGCTTTTTTCACACGCTCTTCCGTTCTATGCGACGTCGGTG
HPV42	ATATTGTGTGTCCTTTGTGTGCCCGCGTGGAGTAAC	TT	CACACGCTCTTCCGTTCTATGCGACGTCGGTG	ATATTGTGTGTCCTTTGTGTGCCCGCGTGGAGTAACTTCACACGCTCTTCCGTTCTATGCGACGTCGGTG
HPV42	CAATGGCGGATGATACAGGTACAGAGGAGGGGCTAG	TT	CACACGCTCTTCCGTTCTATGCGACGTCGGTG	CAATGGCGGATGATACAGGTACAGAGGAGGGGCTAGTTCACACGCTCTTCCGTTCTATGCGACGTCGGTG
HPV42	GCTATTTCAGATGACGAGGACGAAAATGTAGACGATAGTGGG	TT	CACACGCTCTTCCGTTCTATGCGACGTCGGTG	GCTATTTCAGATGACGAGGACGAAAATGTAGACGATAGTGGGTTCACACGCTCTTCCGTTCTATGCGACGTCGGTG
HPV42	CAGATCAGGAGGCAGTACAGGCACTAAAACGAAAGC	TT	CACACGCTCTTCCGTTCTATGCGACGTCGGTG	CAGATCAGGAGGCAGTACAGGCACTAAAACGAAAGCTTCACACGCTCTTCCGTTCTATGCGACGTCGGTG
HPV42	TTAGGCAGTCCATATGAAAGCCCTGTCAGTGATTCA	TT	CACACGCTCTTCCGTTCTATGCGACGTCGGTG	TTAGGCAGTCCATATGAAAGCCCTGTCAGTGATTCATTCACACGCTCTTCCGTTCTATGCGACGTCGGTG
HPV42	GCACAGCATAGACAACGAACTAAGTCCTAGGCTTGG	TT	CACACGCTCTTCCGTTCTATGCGACGTCGGTG	GCACAGCATAGACAACGAACTAAGTCCTAGGCTTGGTTCACACGCTCTTCCGTTCTATGCGACGTCGGTG
HPV42	GTCCCAAGGGGCCAAACGACGATTATTCCAGTCACT	TT	CACACGCTCTTCCGTTCTATGCGACGTCGGTG	GTCCCAAGGGGCCAAACGACGATTATTCCAGTCACTTTCACACGCTCTTCCGTTCTATGCGACGTCGGTG
HPV42	ATCGAGACAGTGGATATGGCTATTCTGAAGTGGAAGTACA	TT	CACACGCTCTTCCGTTCTATGCGACGTCGGTG	ATCGAGACAGTGGATATGGCTATTCTGAAGTGGAAGTACATTCACACGCTCTTCCGTTCTATGCGACGTCGGTG
HPV42	GCAGTGGGTAGTGAACTTGGGGTGCAGGAAAATGAA	TT	CACACGCTCTTCCGTTCTATGCGACGTCGGTG	GCAGTGGGTAGTGAACTTGGGGTGCAGGAAAATGAATTCACACGCTCTTCCGTTCTATGCGACGTCGGTG
HPV42	AGGTAGTACTACAAGTACGCCTACAACAAGGGTGGT	TT	CACACGCTCTTCCGTTCTATGCGACGTCGGTG	AGGTAGTACTACAAGTACGCCTACAACAAGGGTGGTTTCACACGCTCTTCCGTTCTATGCGACGTCGGTG
HPV42	AAAGTGACAAAAGCAGTTGTACAGACTGGGTTATTGCAGC	TT	CACACGCTCTTCCGTTCTATGCGACGTCGGTG	AAAGTGACAAAAGCAGTTGTACAGACTGGGTTATTGCAGCTTCACACGCTCTTCCGTTCTATGCGACGTCGGTG
HPV42	ATCAATTATTAATAGAGCCACCTCGGTTACAAAGTGTGGCTG	TT	CACACGCTCTTCCGTTCTATGCGACGTCGGTG	ATCAATTATTAATAGAGCCACCTCGGTTACAAAGTGTGGCTGTTCACACGCTCTTCCGTTCTATGCGACGTCGGTG
HPV42	AGATCAGGAATATCTAATGCTAGCATTGTAACCGGAGACACA	TT	CACACGCTCTTCCGTTCTATGCGACGTCGGTG	AGATCAGGAATATCTAATGCTAGCATTGTAACCGGAGACACATTCACACGCTCTTCCGTTCTATGCGACGTCGGTG
HPV42	TGCAGATGCCCAATTTAATTTAACAGAAATGGTGCAATGGG	TT	CACACGCTCTTCCGTTCTATGCGACGTCGGTG	TGCAGATGCCCAATTTAATTTAACAGAAATGGTGCAATGGGTTCACACGCTCTTCCGTTCTATGCGACGTCGGTG
HPV42	ACTGAAGACAGTGACATTGCATATGAATATGCACAACGGG	TT	CACACGCTCTTCCGTTCTATGCGACGTCGGTG	ACTGAAGACAGTGACATTGCATATGAATATGCACAACGGGTTCACACGCTCTTCCGTTCTATGCGACGTCGGTG
HPV42	AAAAGCACAAATGAGACGTATGTCTATGGGTGCATGGA	TT	CACACGCTCTTCCGTTCTATGCGACGTCGGTG	AAAAGCACAAATGAGACGTATGTCTATGGGTGCATGGATTCACACGCTCTTCCGTTCTATGCGACGTCGGTG
HPV42	AAACATAGAAGTGCCAAGATAGGGGATAGTGGAGATTGGA	TT	CACACGCTCTTCCGTTCTATGCGACGTCGGTG	AAACATAGAAGTGCCAAGATAGGGGATAGTGGAGATTGGATTCACACGCTCTTCCGTTCTATGCGACGTCGGTG
HPV42	ATTGGTCCTCCAAATACAGGAAAATCACAGTTTGGAATGAGT	TT	CACACGCTCTTCCGTTCTATGCGACGTCGGTG	ATTGGTCCTCCAAATACAGGAAAATCACAGTTTGGAATGAGTTTCACACGCTCTTCCGTTCTATGCGACGTCGGTG
HPV42	AAAATAGCTATGCTGGATGATGCAACTCCACCATGTTG	TT	CACACGCTCTTCCGTTCTATGCGACGTCGGTG	AAAATAGCTATGCTGGATGATGCAACTCCACCATGTTGTTCACACGCTCTTCCGTTCTATGCGACGTCGGTG
HPV42	TCAAAGGTTGTGGTCCAGCTTAGAATTTCAAGAATCAGAGG	TT	CACACGCTCTTCCGTTCTATGCGACGTCGGTG	TCAAAGGTTGTGGTCCAGCTTAGAATTTCAAGAATCAGAGGTTCACACGCTCTTCCGTTCTATGCGACGTCGGTG
HPV42	GAGGAAGACTATGGAGAGACTGGCCAAACGTTTAGATG	TT	CACACGCTCTTCCGTTCTATGCGACGTCGGTG	GAGGAAGACTATGGAGAGACTGGCCAAACGTTTAGATGTTCACACGCTCTTCCGTTCTATGCGACGTCGGTG
HPV42	ACATATTGAACATTGGAAATGTTTACGTATGGAGGCAGTGGT	TT	CACACGCTCTTCCGTTCTATGCGACGTCGGTG	ACATATTGAACATTGGAAATGTTTACGTATGGAGGCAGTGGTTTCACACGCTCTTCCGTTCTATGCGACGTCGGTG
HPV42	TGTATAAGGCCCGTGAAATGGGCTTTGCAAATATAGGA	TT	CACACGCTCTTCCGTTCTATGCGACGTCGGTG	TGTATAAGGCCCGTGAAATGGGCTTTGCAAATATAGGATTCACACGCTCTTCCGTTCTATGCGACGTCGGTG
HPV42	TCAAATAGTACCAACATTGGAAACATGTAGAGCCAAGGCC	TT	CACACGCTCTTCCGTTCTATGCGACGTCGGTG	TCAAATAGTACCAACATTGGAAACATGTAGAGCCAAGGCCTTCACACGCTCTTCCGTTCTATGCGACGTCGGTG
HPV42	ACACTTGGCATTAGAGACATTATTGCAGTCCTCGTATGG	TT	CACACGCTCTTCCGTTCTATGCGACGTCGGTG	ACACTTGGCATTAGAGACATTATTGCAGTCCTCGTATGGTTCACACGCTCTTCCGTTCTATGCGACGTCGGTG
HPV42	AAGAACCATGGACATTGCAAGAAACAAGTAATGAACTGTGG	TT	CACACGCTCTTCCGTTCTATGCGACGTCGGTG	AAGAACCATGGACATTGCAAGAAACAAGTAATGAACTGTGGTTCACACGCTCTTCCGTTCTATGCGACGTCGGTG
HPV42	AAAACAAGGACGTACCGTGGAGGTTATATTTGATGGAAAACA	TT	CACACGCTCTTCCGTTCTATGCGACGTCGGTG	AAAACAAGGACGTACCGTGGAGGTTATATTTGATGGAAAACATTCACACGCTCTTCCGTTCTATGCGACGTCGGTG
HPV42	TACAAACTGTGCAAGGTACATGGTGTAAAGTACAAGGACA	TT	CACACGCTCTTCCGTTCTATGCGACGTCGGTG	TACAAACTGTGCAAGGTACATGGTGTAAAGTACAAGGACATTCACACGCTCTTCCGTTCTATGCGACGTCGGTG
HPV42	AAAATATGGGGTAACAGACCAATGGGAGGTACATGATGG	TT	CACACGCTCTTCCGTTCTATGCGACGTCGGTG	AAAATATGGGGTAACAGACCAATGGGAGGTACATGATGGTTCACACGCTCTTCCGTTCTATGCGACGTCGGTG
HPV42	ATCAGGTGATTGTTTCTCCTGCACCCATATCTAGCAC	TT	CACACGCTCTTCCGTTCTATGCGACGTCGGTG	ATCAGGTGATTGTTTCTCCTGCACCCATATCTAGCACTTCACACGCTCTTCCGTTCTATGCGACGTCGGTG
HPV42	CATCCACCGACGCAGAGATACCCTCTACTGGATCTA	TT	CACACGCTCTTCCGTTCTATGCGACGTCGGTG	CATCCACCGACGCAGAGATACCCTCTACTGGATCTATTCACACGCTCTTCCGTTCTATGCGACGTCGGTG
HPV42	AAGTTGGTACAACAAGTGTGCACCACAAACCCATTG	TT	CACACGCTCTTCCGTTCTATGCGACGTCGGTG	AAGTTGGTACAACAAGTGTGCACCACAAACCCATTGTTCACACGCTCTTCCGTTCTATGCGACGTCGGTG
HPV42	CACAACGTCCATTGACAACCACCACGCAGACTGTAC	TT	CACACGCTCTTCCGTTCTATGCGACGTCGGTG	CACAACGTCCATTGACAACCACCACGCAGACTGTACTTCACACGCTCTTCCGTTCTATGCGACGTCGGTG
HPV42	CCATCCAAACCTCACCGCCACGAAAACGATACAGAC	TT	CACACGCTCTTCCGTTCTATGCGACGTCGGTG	CCATCCAAACCTCACCGCCACGAAAACGATACAGACTTCACACGCTCTTCCGTTCTATGCGACGTCGGTG
HPV42	GTGGACCCTGGATTGTGTGGGGTCAGAACTAACAGT	TT	CACACGCTCTTCCGTTCTATGCGACGTCGGTG	GTGGACCCTGGATTGTGTGGGGTCAGAACTAACAGTTTCACACGCTCTTCCGTTCTATGCGACGTCGGTG
HPV42	AAACTGTAACAAGCGACGGAACCACTGTGGAAGTCA	TT	CACACGCTCTTCCGTTCTATGCGACGTCGGTG	AAACTGTAACAAGCGACGGAACCACTGTGGAAGTCATTCACACGCTCTTCCGTTCTATGCGACGTCGGTG
HPV42	CTACGCCTGTAATTCATTTACAAGGTGACCCTAATTGCCT	TT	CACACGCTCTTCCGTTCTATGCGACGTCGGTG	CTACGCCTGTAATTCATTTACAAGGTGACCCTAATTGCCTTTCACACGCTCTTCCGTTCTATGCGACGTCGGTG
HPV42	CAGTTATAGGACTTCAATACTGTGACTCCACAACGTGTGG	TT	CACACGCTCTTCCGTTCTATGCGACGTCGGTG	CAGTTATAGGACTTCAATACTGTGACTCCACAACGTGTGGTTCACACGCTCTTCCGTTCTATGCGACGTCGGTG
HPV42	CAACCGGCCAGAAACTGCTGCTTTTATTGTTTATAGTTGT	TT	CACACGCTCTTCCGTTCTATGCGACGTCGGTG	CAACCGGCCAGAAACTGCTGCTTTTATTGTTTATAGTTGTTTCACACGCTCTTCCGTTCTATGCGACGTCGGTG
HPV42	TACAAAATTATCCATATCCTGTATGGGCCTCTTGCCTTGC	TT	CACACGCTCTTCCGTTCTATGCGACGTCGGTG	TACAAAATTATCCATATCCTGTATGGGCCTCTTGCCTTGCTTCACACGCTCTTCCGTTCTATGCGACGTCGGTG
HPV42	GCTACCTAACATTGGTGCTATTATCATGGTTGCAGGTACT	TT	CACACGCTCTTCCGTTCTATGCGACGTCGGTG	GCTACCTAACATTGGTGCTATTATCATGGTTGCAGGTACTTTCACACGCTCTTCCGTTCTATGCGACGTCGGTG
HPV42	ATTGTGTGTACTTCTTTTGTGCTATTACAATGCCACCACAAC	TT	CACACGCTCTTCCGTTCTATGCGACGTCGGTG	ATTGTGTGTACTTCTTTTGTGCTATTACAATGCCACCACAACTTCACACGCTCTTCCGTTCTATGCGACGTCGGTG
HPV42	CGCAGACGAAAGCGGGCCTCTGCCACACAATTATAT	TT	CACACGCTCTTCCGTTCTATGCGACGTCGGTG	CGCAGACGAAAGCGGGCCTCTGCCACACAATTATATTTCACACGCTCTTCCGTTCTATGCGACGTCGGTG
HPV42	AACGTGTAAGGCCTCAGGGACATGTCCTCCAGATGT	TT	CACACGCTCTTCCGTTCTATGCGACGTCGGTG	AACGTGTAAGGCCTCAGGGACATGTCCTCCAGATGTTTCACACGCTCTTCCGTTCTATGCGACGTCGGTG
HPV42	CTATGTGCCTCTGGGAACAAGGCCTCCTGTAATTGC	TT	CACACGCTCTTCCGTTCTATGCGACGTCGGTG	CTATGTGCCTCTGGGAACAAGGCCTCCTGTAATTGCTTCACACGCTCTTCCGTTCTATGCGACGTCGGTG
HPV42	CACCAATAGCTGTTGACACCGTGGGGCCATCTGATC	TT	CACACGCTCTTCCGTTCTATGCGACGTCGGTG	CACCAATAGCTGTTGACACCGTGGGGCCATCTGATCTTCACACGCTCTTCCGTTCTATGCGACGTCGGTG
HPV42	CATGGAGGTTTTAATATTACTACATCTACTGGTGGGCCTGC	TT	CACACGCTCTTCCGTTCTATGCGACGTCGGTG	CATGGAGGTTTTAATATTACTACATCTACTGGTGGGCCTGCTTCACACGCTCTTCCGTTCTATGCGACGTCGGTG
HPV42	TCTCCCCTCCCACTAATACTATACGTGTCACAACAACT	TT	CACACGCTCTTCCGTTCTATGCGACGTCGGTG	TCTCCCCTCCCACTAATACTATACGTGTCACAACAACTTTCACACGCTCTTCCGTTCTATGCGACGTCGGTG
HPV42	TCCTTTATATATTGATCCTTTTACATTGCAGCCGCCATTGCC	TT	CACACGCTCTTCCGTTCTATGCGACGTCGGTG	TCCTTTATATATTGATCCTTTTACATTGCAGCCGCCATTGCCTTCACACGCTCTTCCGTTCTATGCGACGTCGGTG
HPV42	CAGAGGTTAATGGGCGCCTATTAATATCTACTCCTACCATCA	TT	CACACGCTCTTCCGTTCTATGCGACGTCGGTG	CAGAGGTTAATGGGCGCCTATTAATATCTACTCCTACCATCATTCACACGCTCTTCCGTTCTATGCGACGTCGGTG
HPV42	CCCCACTCATATGAAGAAATACCAATGGACACGTTTGTTGT	TT	CACACGCTCTTCCGTTCTATGCGACGTCGGTG	CCCCACTCATATGAAGAAATACCAATGGACACGTTTGTTGTTTCACACGCTCTTCCGTTCTATGCGACGTCGGTG
HPV42	ATACAACTAACACATTTACTAGTACTCCCATTCCTGGCCCT	TT	CACACGCTCTTCCGTTCTATGCGACGTCGGTG	ATACAACTAACACATTTACTAGTACTCCCATTCCTGGCCCTTTCACACGCTCTTCCGTTCTATGCGACGTCGGTG
HPV42	GTCGTCTGCACGCCTGGGGTTATATTCTAGAGCAAC	TT	CACACGCTCTTCCGTTCTATGCGACGTCGGTG	GTCGTCTGCACGCCTGGGGTTATATTCTAGAGCAACTTCACACGCTCTTCCGTTCTATGCGACGTCGGTG
HPV42	TTTTAACATCTCCTGCACGGTTGGTTACTTATGACAATCCA	TT	CACACGCTCTTCCGTTCTATGCGACGTCGGTG	TTTTAACATCTCCTGCACGGTTGGTTACTTATGACAATCCATTCACACGCTCTTCCGTTCTATGCGACGTCGGTG
HPV42	ATTAGTATTTGAACATCCATCCATTCATACTGCACCTGACCC	TT	CACACGCTCTTCCGTTCTATGCGACGTCGGTG	ATTAGTATTTGAACATCCATCCATTCATACTGCACCTGACCCTTCACACGCTCTTCCGTTCTATGCGACGTCGGTG
HPV42	TAGTTGCATTGCATCGTCCTATGTTATCATCCAAACAGGG	TT	CACACGCTCTTCCGTTCTATGCGACGTCGGTG	TAGTTGCATTGCATCGTCCTATGTTATCATCCAAACAGGGTTCACACGCTCTTCCGTTCTATGCGACGTCGGTG
HPV42	GTGTACGTGTTAGTAGAATTGGACAAAGGCTGTCTATGCA	TT	CACACGCTCTTCCGTTCTATGCGACGTCGGTG	GTGTACGTGTTAGTAGAATTGGACAAAGGCTGTCTATGCATTCACACGCTCTTCCGTTCTATGCGACGTCGGTG
HPV42	TGAATTACAGCCTTTATCTGCTTCTTCAGTATCTGCAGCC	TT	CACACGCTCTTCCGTTCTATGCGACGTCGGTG	TGAATTACAGCCTTTATCTGCTTCTTCAGTATCTGCAGCCTTCACACGCTCTTCCGTTCTATGCGACGTCGGTG
HPV42	AAATACCACTTCCTCTATACCTATGCATGGTTTTGCTACCCC	TT	CACACGCTCTTCCGTTCTATGCGACGTCGGTG	AAATACCACTTCCTCTATACCTATGCATGGTTTTGCTACCCCTTCACACGCTCTTCCGTTCTATGCGACGTCGGTG
HPV42	TGTCCACTACATCTTTCCCTACATTACCTAGCATGTCTACAC	TT	CACACGCTCTTCCGTTCTATGCGACGTCGGTG	TGTCCACTACATCTTTCCCTACATTACCTAGCATGTCTACACTTCACACGCTCTTCCGTTCTATGCGACGTCGGTG
HPV42	GGACAGTACCCCAACGTCTGTAATGCCTCAGGGTAA	TT	CACACGCTCTTCCGTTCTATGCGACGTCGGTG	GGACAGTACCCCAACGTCTGTAATGCCTCAGGGTAATTCACACGCTCTTCCGTTCTATGCGACGTCGGTG
HPV42	TTTTGGCGTAGGCGCCGTAAACCTGTACCATATTTT	TT	CACACGCTCTTCCGTTCTATGCGACGTCGGTG	TTTTGGCGTAGGCGCCGTAAACCTGTACCATATTTTTTCACACGCTCTTCCGTTCTATGCGACGTCGGTG
HPV42	TGTCCGTGTGGCGGCCTAGTGACAACAAGGTTTATC	TT	CACACGCTCTTCCGTTCTATGCGACGTCGGTG	TGTCCGTGTGGCGGCCTAGTGACAACAAGGTTTATCTTCACACGCTCTTCCGTTCTATGCGACGTCGGTG
HPV42	CCTCCTCCTGTTTCCAAGGTGGTCAGCACTGATGAA	TT	CACACGCTCTTCCGTTCTATGCGACGTCGGTG	CCTCCTCCTGTTTCCAAGGTGGTCAGCACTGATGAATTCACACGCTCTTCCGTTCTATGCGACGTCGGTG
HPV42	TGTGCAACGCACCAACTACTTTTACCATGCCAGCAG	TT	CACACGCTCTTCCGTTCTATGCGACGTCGGTG	TGTGCAACGCACCAACTACTTTTACCATGCCAGCAGTTCACACGCTCTTCCGTTCTATGCGACGTCGGTG
HPV42	AAAAGGCCAAATAAGACATCTATCCCCAAAGTGTCTGGT	TT	CACACGCTCTTCCGTTCTATGCGACGTCGGTG	AAAAGGCCAAATAAGACATCTATCCCCAAAGTGTCTGGTTTCACACGCTCTTCCGTTCTATGCGACGTCGGTG
HPV42	ATTGCCTGAAACTAATTTATATAACCCAGAGACACAGCGCA	TT	CACACGCTCTTCCGTTCTATGCGACGTCGGTG	ATTGCCTGAAACTAATTTATATAACCCAGAGACACAGCGCATTCACACGCTCTTCCGTTCTATGCGACGTCGGTG
HPV42	CTAGAAGTAGGTCGTGGACAGCCTTTGGGCGTTGGTA	TT	CACACGCTCTTCCGTTCTATGCGACGTCGGTG	CTAGAAGTAGGTCGTGGACAGCCTTTGGGCGTTGGTATTCACACGCTCTTCCGTTCTATGCGACGTCGGTG
HPV42	AAGTTGGATGATACTGAAAATGCGCCTACATATGGTGGA	TT	CACACGCTCTTCCGTTCTATGCGACGTCGGTG	AAGTTGGATGATACTGAAAATGCGCCTACATATGGTGGATTCACACGCTCTTCCGTTCTATGCGACGTCGGTG
HPV42	TAAACAAACACAGTTGTGTTTAGTTGGCTGTAAACCTGCC	TT	CACACGCTCTTCCGTTCTATGCGACGTCGGTG	TAAACAAACACAGTTGTGTTTAGTTGGCTGTAAACCTGCCTTCACACGCTCTTCCGTTCTATGCGACGTCGGTG
HPV42	GCACTGGGGTAAAGGTACTGCCTGTACACCACAGTC	TT	CACACGCTCTTCCGTTCTATGCGACGTCGGTG	GCACTGGGGTAAAGGTACTGCCTGTACACCACAGTCTTCACACGCTCTTCCGTTCTATGCGACGTCGGTG
HPV42	GTTTTATTCAGGATGGGGATATGGTGGATGTAGGGTTTGG	TT	CACACGCTCTTCCGTTCTATGCGACGTCGGTG	GTTTTATTCAGGATGGGGATATGGTGGATGTAGGGTTTGGTTCACACGCTCTTCCGTTCTATGCGACGTCGGTG
HPV42	CACTAGATTTTGGTGCTTTACAATCCTCCAAAGCTGAGGT	TT	CACACGCTCTTCCGTTCTATGCGACGTCGGTG	CACTAGATTTTGGTGCTTTACAATCCTCCAAAGCTGAGGTTTCACACGCTCTTCCGTTCTATGCGACGTCGGTG
HPV42	GGCGAGAACAAATGTTTGTTCGTCATTTGTTTAATAGGGCT	TT	CACACGCTCTTCCGTTCTATGCGACGTCGGTG	GGCGAGAACAAATGTTTGTTCGTCATTTGTTTAATAGGGCTTTCACACGCTCTTCCGTTCTATGCGACGTCGGTG
HPV42	CGCAATTGGTGAACCTGTACCTGATGAACTGTATACCA	TT	CACACGCTCTTCCGTTCTATGCGACGTCGGTG	CGCAATTGGTGAACCTGTACCTGATGAACTGTATACCATTCACACGCTCTTCCGTTCTATGCGACGTCGGTG
HPV42	TATCCTACCCCTAGTGGTTCTATGGTAACATCTGATGCAC	TT	CACACGCTCTTCCGTTCTATGCGACGTCGGTG	TATCCTACCCCTAGTGGTTCTATGGTAACATCTGATGCACTTCACACGCTCTTCCGTTCTATGCGACGTCGGTG
HPV42	TTACAACAAGCACAAGGACACAATAATGGTATATGTTGGGGA	TT	CACACGCTCTTCCGTTCTATGCGACGTCGGTG	TTACAACAAGCACAAGGACACAATAATGGTATATGTTGGGGATTCACACGCTCTTCCGTTCTATGCGACGTCGGTG
HPV42	TGGTTGATACTACCCGTAGTACTAACATGACTTTGTGTGCC	TT	CACACGCTCTTCCGTTCTATGCGACGTCGGTG	TGGTTGATACTACCCGTAGTACTAACATGACTTTGTGTGCCTTCACACGCTCTTCCGTTCTATGCGACGTCGGTG
HPV42	GAATCCTAACATATTAGAGGAGTGGAATGTTGGTGTTGCACC	TT	CACACGCTCTTCCGTTCTATGCGACGTCGGTG	GAATCCTAACATATTAGAGGAGTGGAATGTTGGTGTTGCACCTTCACACGCTCTTCCGTTCTATGCGACGTCGGTG
HPV42	ATAGGTATGTACAATCAGAAGCTATTCGCTGTCAGGCTAAGG	TT	CACACGCTCTTCCGTTCTATGCGACGTCGGTG	ATAGGTATGTACAATCAGAAGCTATTCGCTGTCAGGCTAAGGTTCACACGCTCTTCCGTTCTATGCGACGTCGGTG
HPV42	GGTTGCGTGCAAGGCCTAAACTGTCTGTAGGTAAAC	TT	CACACGCTCTTCCGTTCTATGCGACGTCGGTG	GGTTGCGTGCAAGGCCTAAACTGTCTGTAGGTAAACTTCACACGCTCTTCCGTTCTATGCGACGTCGGTG
HPV42	AAGGCGTCTACAGCTAAATCTGTTTCTTCAGCTAAACGT	TT	CACACGCTCTTCCGTTCTATGCGACGTCGGTG	AAGGCGTCTACAGCTAAATCTGTTTCTTCAGCTAAACGTTTCACACGCTCTTCCGTTCTATGCGACGTCGGTG
HPV42	ACTCCATTTTGTTTCTAGACCGATTTCGGTTGTATCTGGC	TT	CACACGCTCTTCCGTTCTATGCGACGTCGGTG	ACTCCATTTTGTTTCTAGACCGATTTCGGTTGTATCTGGCTTCACACGCTCTTCCGTTCTATGCGACGTCGGTG
HPV42	GTTACCAGGTGCATTGGCCATGTTTCCTAACATTTTGC	TT	CACACGCTCTTCCGTTCTATGCGACGTCGGTG	GTTACCAGGTGCATTGGCCATGTTTCCTAACATTTTGCTTCACACGCTCTTCCGTTCTATGCGACGTCGGTG
HPV42	GTTCTGCCAACGTACACTCCCTAATTCCTTTACATAACACA	TT	CACACGCTCTTCCGTTCTATGCGACGTCGGTG	GTTCTGCCAACGTACACTCCCTAATTCCTTTACATAACACATTCACACGCTCTTCCGTTCTATGCGACGTCGGTG
#170	CTGCACCAGGACTGGAGTAGCTTTTGACCAGGACAG	TT	CATTGCCGTATGGGCTAGGATGACCTGGCTCG	CTGCACCAGGACTGGAGTAGCTTTTGACCAGGACAGTTCATTGCCGTATGGGCTAGGATGACCTGGCTCG
#170	GCTCTTGACCATGTTAAATCTGAGAGCCTCAGACTCC	TT	CATTGCCGTATGGGCTAGGATGACCTGGCTCG	GCTCTTGACCATGTTAAATCTGAGAGCCTCAGACTCCTTCATTGCCGTATGGGCTAGGATGACCTGGCTCG
#170	TTGGCCCAGGACCTGACCCATGCTAGATGCTCAATA	TT	CATTGCCGTATGGGCTAGGATGACCTGGCTCG	TTGGCCCAGGACCTGACCCATGCTAGATGCTCAATATTCATTGCCGTATGGGCTAGGATGACCTGGCTCG
#170	TGATGATCATCAAAAGTCCTTTGGTCTCTCCAAAAGTGCT	TT	CATTGCCGTATGGGCTAGGATGACCTGGCTCG	TGATGATCATCAAAAGTCCTTTGGTCTCTCCAAAAGTGCTTTCATTGCCGTATGGGCTAGGATGACCTGGCTCG
#170	AAGCATCTCTTGTCATCAATGTGTCTGAGCTTTTGAGACA	TT	CATTGCCGTATGGGCTAGGATGACCTGGCTCG	AAGCATCTCTTGTCATCAATGTGTCTGAGCTTTTGAGACATTCATTGCCGTATGGGCTAGGATGACCTGGCTCG
#170	GCCGTGTGGTAGTTTTCCACTGGGTTCACCAAACTA	TT	CATTGCCGTATGGGCTAGGATGACCTGGCTCG	GCCGTGTGGTAGTTTTCCACTGGGTTCACCAAACTATTCATTGCCGTATGGGCTAGGATGACCTGGCTCG
#170	TTCCAAAAGGTTCCTGATTAACAATCTTTCAGAGAGGGAGGA	TT	CATTGCCGTATGGGCTAGGATGACCTGGCTCG	TTCCAAAAGGTTCCTGATTAACAATCTTTCAGAGAGGGAGGATTCATTGCCGTATGGGCTAGGATGACCTGGCTCG
#170	GCTGGGAGGCTGCTATTTCAGACTCAATCAGCTACC	TT	CATTGCCGTATGGGCTAGGATGACCTGGCTCG	GCTGGGAGGCTGCTATTTCAGACTCAATCAGCTACCTTCATTGCCGTATGGGCTAGGATGACCTGGCTCG
#170	CAGGGTCAATGGATGAAATGCCTCCCCATAGGGATC	TT	CATTGCCGTATGGGCTAGGATGACCTGGCTCG	CAGGGTCAATGGATGAAATGCCTCCCCATAGGGATCTTCATTGCCGTATGGGCTAGGATGACCTGGCTCG
#170	AAAACCCCAACTGCTCAAAAGACTCAGGGACCTCAA	TT	CATTGCCGTATGGGCTAGGATGACCTGGCTCG	AAAACCCCAACTGCTCAAAAGACTCAGGGACCTCAATTCATTGCCGTATGGGCTAGGATGACCTGGCTCG
#170	CTAAAGGGGATGGGAGCCCAATTTCTTTAAGAAGCACC	TT	CATTGCCGTATGGGCTAGGATGACCTGGCTCG	CTAAAGGGGATGGGAGCCCAATTTCTTTAAGAAGCACCTTCATTGCCGTATGGGCTAGGATGACCTGGCTCG
#170	TCTTTGAAAAGCAGCATTTCTCACTCTACCTCTGCAGG	TT	CATTGCCGTATGGGCTAGGATGACCTGGCTCG	TCTTTGAAAAGCAGCATTTCTCACTCTACCTCTGCAGGTTCATTGCCGTATGGGCTAGGATGACCTGGCTCG
#170	AGGAGCAACATACATCCCCTGAAAGTAATTACCTTCAAGTTG	TT	CATTGCCGTATGGGCTAGGATGACCTGGCTCG	AGGAGCAACATACATCCCCTGAAAGTAATTACCTTCAAGTTGTTCATTGCCGTATGGGCTAGGATGACCTGGCTCG
#170	AGGATCAAACGCCATCCTTAACTGGAGATAATCCGAAATT	TT	CATTGCCGTATGGGCTAGGATGACCTGGCTCG	AGGATCAAACGCCATCCTTAACTGGAGATAATCCGAAATTTTCATTGCCGTATGGGCTAGGATGACCTGGCTCG
#170	CCCCTCTGTCCAAGCAGGCTTAAGTCTCTAACTGCT	TT	CATTGCCGTATGGGCTAGGATGACCTGGCTCG	CCCCTCTGTCCAAGCAGGCTTAAGTCTCTAACTGCTTTCATTGCCGTATGGGCTAGGATGACCTGGCTCG
#170	ATGGTCTTTCTTTCCTTGCCACAAACAGAGTAAGGTAAGAG	TT	CATTGCCGTATGGGCTAGGATGACCTGGCTCG	ATGGTCTTTCTTTCCTTGCCACAAACAGAGTAAGGTAAGAGTTCATTGCCGTATGGGCTAGGATGACCTGGCTCG
#170	AGACAGCCAAGAAACCTGTTGAACTGCTGATGAGAA	TT	CATTGCCGTATGGGCTAGGATGACCTGGCTCG	AGACAGCCAAGAAACCTGTTGAACTGCTGATGAGAATTCATTGCCGTATGGGCTAGGATGACCTGGCTCG
#170	GCGACAGCAATAAAATCACTGGCCCAAAATAATTCTGCC	TT	CATTGCCGTATGGGCTAGGATGACCTGGCTCG	GCGACAGCAATAAAATCACTGGCCCAAAATAATTCTGCCTTCATTGCCGTATGGGCTAGGATGACCTGGCTCG
#170	AGGTTAACTCAACGGCAAGTATGTTGCTCTCACCTC	TT	CATTGCCGTATGGGCTAGGATGACCTGGCTCG	AGGTTAACTCAACGGCAAGTATGTTGCTCTCACCTCTTCATTGCCGTATGGGCTAGGATGACCTGGCTCG
#170	AGGATGGCGAATTCTTAAGTTCTTTTGTTCCAATCACCATCT	TT	CATTGCCGTATGGGCTAGGATGACCTGGCTCG	AGGATGGCGAATTCTTAAGTTCTTTTGTTCCAATCACCATCTTTCATTGCCGTATGGGCTAGGATGACCTGGCTCG
#170	CAGAAATGGCTACATTAAGTTGTAGGGCCTCATGTCAAACA	TT	CATTGCCGTATGGGCTAGGATGACCTGGCTCG	CAGAAATGGCTACATTAAGTTGTAGGGCCTCATGTCAAACATTCATTGCCGTATGGGCTAGGATGACCTGGCTCG
#170	AGTGGCAGCGAGGATGGTTACTTCTGTGTGTTAACT	TT	CATTGCCGTATGGGCTAGGATGACCTGGCTCG	AGTGGCAGCGAGGATGGTTACTTCTGTGTGTTAACTTTCATTGCCGTATGGGCTAGGATGACCTGGCTCG
#170	TGAACTGGTGAACTCAGTAAAGTACATGGCCCTTTCC	TT	CATTGCCGTATGGGCTAGGATGACCTGGCTCG	TGAACTGGTGAACTCAGTAAAGTACATGGCCCTTTCCTTCATTGCCGTATGGGCTAGGATGACCTGGCTCG
#170	TGGTTATCAGCCAGTAGATGGAGGGCCCACAAAGAG	TT	CATTGCCGTATGGGCTAGGATGACCTGGCTCG	TGGTTATCAGCCAGTAGATGGAGGGCCCACAAAGAGTTCATTGCCGTATGGGCTAGGATGACCTGGCTCG
#170	CCTTCTCCAGCTCAGACCGGGATTTACATTATTGGC	TT	CATTGCCGTATGGGCTAGGATGACCTGGCTCG	CCTTCTCCAGCTCAGACCGGGATTTACATTATTGGCTTCATTGCCGTATGGGCTAGGATGACCTGGCTCG
#170	CCTTGATTCTCAGACCCTTGGCCTGGGACTGGATTT	TT	CATTGCCGTATGGGCTAGGATGACCTGGCTCG	CCTTGATTCTCAGACCCTTGGCCTGGGACTGGATTTTTCATTGCCGTATGGGCTAGGATGACCTGGCTCG
#170	CAGCTTGCAGAGAGTAGCTGCAGGGACTTCCCAAAC	TT	CATTGCCGTATGGGCTAGGATGACCTGGCTCG	CAGCTTGCAGAGAGTAGCTGCAGGGACTTCCCAAACTTCATTGCCGTATGGGCTAGGATGACCTGGCTCG
#170	CCCAAATCTGAAAAGATCCAGAATGCACAAAGATTCTGGTC	TT	CATTGCCGTATGGGCTAGGATGACCTGGCTCG	CCCAAATCTGAAAAGATCCAGAATGCACAAAGATTCTGGTCTTCATTGCCGTATGGGCTAGGATGACCTGGCTCG
#170	AAGCACTTTGGTTAAGAGACACTCAGCCTGTACATGG	TT	CATTGCCGTATGGGCTAGGATGACCTGGCTCG	AAGCACTTTGGTTAAGAGACACTCAGCCTGTACATGGTTCATTGCCGTATGGGCTAGGATGACCTGGCTCG
#170	TGCCTCTCATGGCTCCTCTCCCTGTATTTTCCCAAC	TT	CATTGCCGTATGGGCTAGGATGACCTGGCTCG	TGCCTCTCATGGCTCCTCTCCCTGTATTTTCCCAACTTCATTGCCGTATGGGCTAGGATGACCTGGCTCG
#170	TCCCCACCCTAATTTGTGAATGTTTACATATGGTCTTCCAG	TT	CATTGCCGTATGGGCTAGGATGACCTGGCTCG	TCCCCACCCTAATTTGTGAATGTTTACATATGGTCTTCCAGTTCATTGCCGTATGGGCTAGGATGACCTGGCTCG
#170	AAAACAGAGCTAACCAGCCACCTCAGGGATCCTCAA	TT	CATTGCCGTATGGGCTAGGATGACCTGGCTCG	AAAACAGAGCTAACCAGCCACCTCAGGGATCCTCAATTCATTGCCGTATGGGCTAGGATGACCTGGCTCG
#170	CCTTTTAGTTTGTAGACCAGAACCTGAAGCCTGAGCT	TT	CATTGCCGTATGGGCTAGGATGACCTGGCTCG	CCTTTTAGTTTGTAGACCAGAACCTGAAGCCTGAGCTTTCATTGCCGTATGGGCTAGGATGACCTGGCTCG
#170	AAGAGATAGTATCTAAAGTAAACTGGGGCTGAACAGCACTCA	TT	CATTGCCGTATGGGCTAGGATGACCTGGCTCG	AAGAGATAGTATCTAAAGTAAACTGGGGCTGAACAGCACTCATTCATTGCCGTATGGGCTAGGATGACCTGGCTCG
#170	TTATATAAACACTGAGCTGACTGGATGTGTCCTTCAAGGC	TT	CATTGCCGTATGGGCTAGGATGACCTGGCTCG	TTATATAAACACTGAGCTGACTGGATGTGTCCTTCAAGGCTTCATTGCCGTATGGGCTAGGATGACCTGGCTCG
#170	TATTTTGCTGACCTATGGCTTAGAGCGGCGCTTCTC	TT	CATTGCCGTATGGGCTAGGATGACCTGGCTCG	TATTTTGCTGACCTATGGCTTAGAGCGGCGCTTCTCTTCATTGCCGTATGGGCTAGGATGACCTGGCTCG
#170	ACTTCACGTGCACATCTATCGCCTGGGAATCTTGTG	TT	CATTGCCGTATGGGCTAGGATGACCTGGCTCG	ACTTCACGTGCACATCTATCGCCTGGGAATCTTGTGTTCATTGCCGTATGGGCTAGGATGACCTGGCTCG
#170	AAGTGTATCTTCAGAAGGGGAATACCATGTCATTGGTGATCA	TT	CATTGCCGTATGGGCTAGGATGACCTGGCTCG	AAGTGTATCTTCAGAAGGGGAATACCATGTCATTGGTGATCATTCATTGCCGTATGGGCTAGGATGACCTGGCTCG
#170	TTTTAACCACCGCTGTGCATTTTCTGGTGGCAGTTA	TT	CATTGCCGTATGGGCTAGGATGACCTGGCTCG	TTTTAACCACCGCTGTGCATTTTCTGGTGGCAGTTATTCATTGCCGTATGGGCTAGGATGACCTGGCTCG
#170	ACGGACATATAGCGATCAATGCAGGTAAACGAATCCA	TT	CATTGCCGTATGGGCTAGGATGACCTGGCTCG	ACGGACATATAGCGATCAATGCAGGTAAACGAATCCATTCATTGCCGTATGGGCTAGGATGACCTGGCTCG
#170	CGAAGGCAGGCCATGGATGGTAAATCACGTTGTCCA	TT	CATTGCCGTATGGGCTAGGATGACCTGGCTCG	CGAAGGCAGGCCATGGATGGTAAATCACGTTGTCCATTCATTGCCGTATGGGCTAGGATGACCTGGCTCG
#170	AAAGTTGCTAAATTAGCAACAGCGTGACACAGAGCA	TT	CATTGCCGTATGGGCTAGGATGACCTGGCTCG	AAAGTTGCTAAATTAGCAACAGCGTGACACAGAGCATTCATTGCCGTATGGGCTAGGATGACCTGGCTCG
#170	CTGCGGATCCTTCTGGGGTCTGGAAGCTCTGAATTT	TT	CATTGCCGTATGGGCTAGGATGACCTGGCTCG	CTGCGGATCCTTCTGGGGTCTGGAAGCTCTGAATTTTTCATTGCCGTATGGGCTAGGATGACCTGGCTCG
#170	GGGGATATAATGTGAAACCGGTGTGGAGGCTTTTCC	TT	CATTGCCGTATGGGCTAGGATGACCTGGCTCG	GGGGATATAATGTGAAACCGGTGTGGAGGCTTTTCCTTCATTGCCGTATGGGCTAGGATGACCTGGCTCG
#170	AGGGTCTGTTGCCCACAGGCAGATACCAATGGTTGTATT	TT	CATTGCCGTATGGGCTAGGATGACCTGGCTCG	AGGGTCTGTTGCCCACAGGCAGATACCAATGGTTGTATTTTCATTGCCGTATGGGCTAGGATGACCTGGCTCG
#170	ACACACAGCGGTATTTAATAAACCTCTTCACCATCCAGT	TT	CATTGCCGTATGGGCTAGGATGACCTGGCTCG	ACACACAGCGGTATTTAATAAACCTCTTCACCATCCAGTTTCATTGCCGTATGGGCTAGGATGACCTGGCTCG
#170	AAAATGGCTGGTTCCACTCAAACACTGCTGGCAGGAAT	TT	CATTGCCGTATGGGCTAGGATGACCTGGCTCG	AAAATGGCTGGTTCCACTCAAACACTGCTGGCAGGAATTTCATTGCCGTATGGGCTAGGATGACCTGGCTCG
#170	GCCTGGAAATGGACTCCGATTGGCATAAGGAGTCTT	TT	CATTGCCGTATGGGCTAGGATGACCTGGCTCG	GCCTGGAAATGGACTCCGATTGGCATAAGGAGTCTTTTCATTGCCGTATGGGCTAGGATGACCTGGCTCG
#170	CATAGAGATCCTGTAGACTGCAATAAACCCAAAGACACGC	TT	CATTGCCGTATGGGCTAGGATGACCTGGCTCG	CATAGAGATCCTGTAGACTGCAATAAACCCAAAGACACGCTTCATTGCCGTATGGGCTAGGATGACCTGGCTCG
#170	GTTGTTCTAGAGGAGGCTAAAGCAAGTCTTCCGACC	TT	CATTGCCGTATGGGCTAGGATGACCTGGCTCG	GTTGTTCTAGAGGAGGCTAAAGCAAGTCTTCCGACCTTCATTGCCGTATGGGCTAGGATGACCTGGCTCG
#170	TTTTACAGTGAACGATGAATTCATCTGTGGTCAGAGCATCA	TT	CATTGCCGTATGGGCTAGGATGACCTGGCTCG	TTTTACAGTGAACGATGAATTCATCTGTGGTCAGAGCATCATTCATTGCCGTATGGGCTAGGATGACCTGGCTCG
#170	CAGGAGCTTCCAAAGACCTAAGCCCTGAGGAGAATG	TT	CATTGCCGTATGGGCTAGGATGACCTGGCTCG	CAGGAGCTTCCAAAGACCTAAGCCCTGAGGAGAATGTTCATTGCCGTATGGGCTAGGATGACCTGGCTCG
#170	AATCAGGAGTGACGGTAATGATGACAAAGGCTCAGC	TT	CATTGCCGTATGGGCTAGGATGACCTGGCTCG	AATCAGGAGTGACGGTAATGATGACAAAGGCTCAGCTTCATTGCCGTATGGGCTAGGATGACCTGGCTCG
#170	AAAACTCCCATGCCCACCCAACAAGCCATGTCTTTT	TT	CATTGCCGTATGGGCTAGGATGACCTGGCTCG	AAAACTCCCATGCCCACCCAACAAGCCATGTCTTTTTTCATTGCCGTATGGGCTAGGATGACCTGGCTCG
#170	ACCATGCTATCACCCCGAAAAGTGACTCTTTTGAGG	TT	CATTGCCGTATGGGCTAGGATGACCTGGCTCG	ACCATGCTATCACCCCGAAAAGTGACTCTTTTGAGGTTCATTGCCGTATGGGCTAGGATGACCTGGCTCG
#170	AAAAGTAAGGAAGCACGGTCGGGAAGGGTTGCCTAG	TT	CATTGCCGTATGGGCTAGGATGACCTGGCTCG	AAAAGTAAGGAAGCACGGTCGGGAAGGGTTGCCTAGTTCATTGCCGTATGGGCTAGGATGACCTGGCTCG
#170	CAGCCCACTTCAGAATCCACAAACACGCATGATGGT	TT	CATTGCCGTATGGGCTAGGATGACCTGGCTCG	CAGCCCACTTCAGAATCCACAAACACGCATGATGGTTTCATTGCCGTATGGGCTAGGATGACCTGGCTCG
#170	CCAGCTCAGGGTCAAAGACAGAACTTGGGGCTAGAA	TT	CATTGCCGTATGGGCTAGGATGACCTGGCTCG	CCAGCTCAGGGTCAAAGACAGAACTTGGGGCTAGAATTCATTGCCGTATGGGCTAGGATGACCTGGCTCG
#170	CATCTGGGTGCTGGGTAGTTGAGCCTACCAGGTACA	TT	CATTGCCGTATGGGCTAGGATGACCTGGCTCG	CATCTGGGTGCTGGGTAGTTGAGCCTACCAGGTACATTCATTGCCGTATGGGCTAGGATGACCTGGCTCG
#170	GCCGAGGAGGCTTTGGGGTCTGAAGAATGGAATTTG	TT	CATTGCCGTATGGGCTAGGATGACCTGGCTCG	GCCGAGGAGGCTTTGGGGTCTGAAGAATGGAATTTGTTCATTGCCGTATGGGCTAGGATGACCTGGCTCG
#170	CTCCAGCGAGGGACTTAACAGCATTTCCTCTATAGC	TT	CATTGCCGTATGGGCTAGGATGACCTGGCTCG	CTCCAGCGAGGGACTTAACAGCATTTCCTCTATAGCTTCATTGCCGTATGGGCTAGGATGACCTGGCTCG
#170	CAAAGGTATTTGAATCAGGAACACTAGCTTCACAGCCAGA	TT	CATTGCCGTATGGGCTAGGATGACCTGGCTCG	CAAAGGTATTTGAATCAGGAACACTAGCTTCACAGCCAGATTCATTGCCGTATGGGCTAGGATGACCTGGCTCG
#170	TTTTCCTTCATTCCTAGCGGCAAGGCTGGATAAGCT	TT	CATTGCCGTATGGGCTAGGATGACCTGGCTCG	TTTTCCTTCATTCCTAGCGGCAAGGCTGGATAAGCTTTCATTGCCGTATGGGCTAGGATGACCTGGCTCG
#170	TCAAGAGCAGGCAAACTACATCTTAGCTCTGATCCTTTC	TT	CATTGCCGTATGGGCTAGGATGACCTGGCTCG	TCAAGAGCAGGCAAACTACATCTTAGCTCTGATCCTTTCTTCATTGCCGTATGGGCTAGGATGACCTGGCTCG
#170	GAAATCCATTTGGCGCCTTTAACGTTTCATTTGGCA	TT	CATTGCCGTATGGGCTAGGATGACCTGGCTCG	GAAATCCATTTGGCGCCTTTAACGTTTCATTTGGCATTCATTGCCGTATGGGCTAGGATGACCTGGCTCG
#170	TTGAATTTCGGGCATGTATTTATGGGACTGGGTTTGC	TT	CATTGCCGTATGGGCTAGGATGACCTGGCTCG	TTGAATTTCGGGCATGTATTTATGGGACTGGGTTTGCTTCATTGCCGTATGGGCTAGGATGACCTGGCTCG
#170	TGCATAAATCCCATTACAGTATCCACTTCAGTGTGTTTGGG	TT	CATTGCCGTATGGGCTAGGATGACCTGGCTCG	TGCATAAATCCCATTACAGTATCCACTTCAGTGTGTTTGGGTTCATTGCCGTATGGGCTAGGATGACCTGGCTCG
#170	TTTCTAAGCCAGGGCTTTATCTAAGTGGACAGCATGG	TT	CATTGCCGTATGGGCTAGGATGACCTGGCTCG	TTTCTAAGCCAGGGCTTTATCTAAGTGGACAGCATGGTTCATTGCCGTATGGGCTAGGATGACCTGGCTCG
#170	CTGGAACCAACCTTTGCAGATTGCCTCCATCATCAT	TT	CATTGCCGTATGGGCTAGGATGACCTGGCTCG	CTGGAACCAACCTTTGCAGATTGCCTCCATCATCATTTCATTGCCGTATGGGCTAGGATGACCTGGCTCG
#170	ATGTCAAATGATGTTTTGGGAAAAGTTCTGGGAAGGGTC	TT	CATTGCCGTATGGGCTAGGATGACCTGGCTCG	ATGTCAAATGATGTTTTGGGAAAAGTTCTGGGAAGGGTCTTCATTGCCGTATGGGCTAGGATGACCTGGCTCG
#170	AATGAAGCATGTCCCATCCACAAAGAAGGTGGTGAC	TT	CATTGCCGTATGGGCTAGGATGACCTGGCTCG	AATGAAGCATGTCCCATCCACAAAGAAGGTGGTGACTTCATTGCCGTATGGGCTAGGATGACCTGGCTCG
#170	TCCACATCCCTCTTCCTTCTGGCAACAGCCAGAGAA	TT	CATTGCCGTATGGGCTAGGATGACCTGGCTCG	TCCACATCCCTCTTCCTTCTGGCAACAGCCAGAGAATTCATTGCCGTATGGGCTAGGATGACCTGGCTCG
#170	TCTGTTATCCACACAATGCCTTTCTGTCTTTCGTAAGTATGC	TT	CATTGCCGTATGGGCTAGGATGACCTGGCTCG	TCTGTTATCCACACAATGCCTTTCTGTCTTTCGTAAGTATGCTTCATTGCCGTATGGGCTAGGATGACCTGGCTCG
#170	AAGTGAGCTATAAACAAAACAGATCAGGCTTAGCAACCCT	TT	CATTGCCGTATGGGCTAGGATGACCTGGCTCG	AAGTGAGCTATAAACAAAACAGATCAGGCTTAGCAACCCTTTCATTGCCGTATGGGCTAGGATGACCTGGCTCG
#170	CTTGGCCCATGCACTCATGGCACACACCTTAGTTCAT	TT	CATTGCCGTATGGGCTAGGATGACCTGGCTCG	CTTGGCCCATGCACTCATGGCACACACCTTAGTTCATTTCATTGCCGTATGGGCTAGGATGACCTGGCTCG
#170	CCACTTACTTCCCAGGCAACAAGGCAGAGATGCCTG	TT	CATTGCCGTATGGGCTAGGATGACCTGGCTCG	CCACTTACTTCCCAGGCAACAAGGCAGAGATGCCTGTTCATTGCCGTATGGGCTAGGATGACCTGGCTCG
#170	GCACGCACCATATGCAAGAGTCAGGGGTTACACCAG	TT	CATTGCCGTATGGGCTAGGATGACCTGGCTCG	GCACGCACCATATGCAAGAGTCAGGGGTTACACCAGTTCATTGCCGTATGGGCTAGGATGACCTGGCTCG
#170	TGAAGTGTCAGTACATTAAGAACCATTTCCTTCCTCCTGGG	TT	CATTGCCGTATGGGCTAGGATGACCTGGCTCG	TGAAGTGTCAGTACATTAAGAACCATTTCCTTCCTCCTGGGTTCATTGCCGTATGGGCTAGGATGACCTGGCTCG
#170	CTGTCCTGGAAGCACGCACAGAACTCTCCATTCACT	TT	CATTGCCGTATGGGCTAGGATGACCTGGCTCG	CTGTCCTGGAAGCACGCACAGAACTCTCCATTCACTTTCATTGCCGTATGGGCTAGGATGACCTGGCTCG
#170	TTCACATAAATAGACTCCAAAGCAGAAATGCATGGAAAGGGG	TT	CATTGCCGTATGGGCTAGGATGACCTGGCTCG	TTCACATAAATAGACTCCAAAGCAGAAATGCATGGAAAGGGGTTCATTGCCGTATGGGCTAGGATGACCTGGCTCG
#170	GGGCCTCAGAGCCCCACATAAAGCTAAAGGAAAGCC	TT	CATTGCCGTATGGGCTAGGATGACCTGGCTCG	GGGCCTCAGAGCCCCACATAAAGCTAAAGGAAAGCCTTCATTGCCGTATGGGCTAGGATGACCTGGCTCG
#170	AAAAGGCAACGGCAGCTGCAGTAAACGAAGAAGTGT	TT	CATTGCCGTATGGGCTAGGATGACCTGGCTCG	AAAAGGCAACGGCAGCTGCAGTAAACGAAGAAGTGTTTCATTGCCGTATGGGCTAGGATGACCTGGCTCG
#170	GTGATGAGGGCCCTTTGGGCTATTTCAGGCTCTGTC	TT	CATTGCCGTATGGGCTAGGATGACCTGGCTCG	GTGATGAGGGCCCTTTGGGCTATTTCAGGCTCTGTCTTCATTGCCGTATGGGCTAGGATGACCTGGCTCG
#170	GGGCCTCAGAGCTTGTGAAGGTAAATGCTTCCTGAT	TT	CATTGCCGTATGGGCTAGGATGACCTGGCTCG	GGGCCTCAGAGCTTGTGAAGGTAAATGCTTCCTGATTTCATTGCCGTATGGGCTAGGATGACCTGGCTCG
#170	CTCCAGCAGGTGGCCAAAGGGAACCTGGTATACTAA	TT	CATTGCCGTATGGGCTAGGATGACCTGGCTCG	CTCCAGCAGGTGGCCAAAGGGAACCTGGTATACTAATTCATTGCCGTATGGGCTAGGATGACCTGGCTCG
#170	CCTCTCTCCAGGGCTGAATCCTCCAAGGATTCTCTC	TT	CATTGCCGTATGGGCTAGGATGACCTGGCTCG	CCTCTCTCCAGGGCTGAATCCTCCAAGGATTCTCTCTTCATTGCCGTATGGGCTAGGATGACCTGGCTCG
#170	TGACTTTATTTTCATCTTACATCACCCGTGAGCAGCTGG	TT	CATTGCCGTATGGGCTAGGATGACCTGGCTCG	TGACTTTATTTTCATCTTACATCACCCGTGAGCAGCTGGTTCATTGCCGTATGGGCTAGGATGACCTGGCTCG
#170	ATACAGACAGGAAGGGGTAAAGGGATTTGAACCAAGG	TT	CATTGCCGTATGGGCTAGGATGACCTGGCTCG	ATACAGACAGGAAGGGGTAAAGGGATTTGAACCAAGGTTCATTGCCGTATGGGCTAGGATGACCTGGCTCG
#170	CCTTGCTTTCAGGAGTTTGCTGTGGTCTGATCTCAG	TT	CATTGCCGTATGGGCTAGGATGACCTGGCTCG	CCTTGCTTTCAGGAGTTTGCTGTGGTCTGATCTCAGTTCATTGCCGTATGGGCTAGGATGACCTGGCTCG
#170	GCCCAGGCAGCATTGGTGAAACTGAATTTGATCATC	TT	CATTGCCGTATGGGCTAGGATGACCTGGCTCG	GCCCAGGCAGCATTGGTGAAACTGAATTTGATCATCTTCATTGCCGTATGGGCTAGGATGACCTGGCTCG
#170	TAGAAGTCCAAAAGGGAATCTACTTCAAATGACCAGAGAGCT	TT	CATTGCCGTATGGGCTAGGATGACCTGGCTCG	TAGAAGTCCAAAAGGGAATCTACTTCAAATGACCAGAGAGCTTTCATTGCCGTATGGGCTAGGATGACCTGGCTCG
#170	AACAGTTCAGAAACACAATTTACATCTCCACTGGTGCTTTCC	TT	CATTGCCGTATGGGCTAGGATGACCTGGCTCG	AACAGTTCAGAAACACAATTTACATCTCCACTGGTGCTTTCCTTCATTGCCGTATGGGCTAGGATGACCTGGCTCG
#170	AAACTAGCATTTCTGTTACGCTGACAATACAGAAGAGCAAGG	TT	CATTGCCGTATGGGCTAGGATGACCTGGCTCG	AAACTAGCATTTCTGTTACGCTGACAATACAGAAGAGCAAGGTTCATTGCCGTATGGGCTAGGATGACCTGGCTCG
#170	TTCTGGAACTGTTTGGCTTACACAGGCGTGAGAGAA	TT	CATTGCCGTATGGGCTAGGATGACCTGGCTCG	TTCTGGAACTGTTTGGCTTACACAGGCGTGAGAGAATTCATTGCCGTATGGGCTAGGATGACCTGGCTCG
#170	GAAGACTTATTCCATTCACTGGGTAACATATGGGTTTCCCAG	TT	CATTGCCGTATGGGCTAGGATGACCTGGCTCG	GAAGACTTATTCCATTCACTGGGTAACATATGGGTTTCCCAGTTCATTGCCGTATGGGCTAGGATGACCTGGCTCG
#170	AGAAAGTCCACACAGCCATGCATGTGAAATGGGTGA	TT	CATTGCCGTATGGGCTAGGATGACCTGGCTCG	AGAAAGTCCACACAGCCATGCATGTGAAATGGGTGATTCATTGCCGTATGGGCTAGGATGACCTGGCTCG
#170	ATAACAATAGTAATTGCTGACCCTCTTGAGTCCTTCCTGGG	TT	CATTGCCGTATGGGCTAGGATGACCTGGCTCG	ATAACAATAGTAATTGCTGACCCTCTTGAGTCCTTCCTGGGTTCATTGCCGTATGGGCTAGGATGACCTGGCTCG
#170	TGAATCCTCATGAGAACCTTCTGTGGCAGGTAAACA	TT	CATTGCCGTATGGGCTAGGATGACCTGGCTCG	TGAATCCTCATGAGAACCTTCTGTGGCAGGTAAACATTCATTGCCGTATGGGCTAGGATGACCTGGCTCG
#170	AAAACGATGCTTGCCAAAATCCAGACATCTCAGACATG	TT	CATTGCCGTATGGGCTAGGATGACCTGGCTCG	AAAACGATGCTTGCCAAAATCCAGACATCTCAGACATGTTCATTGCCGTATGGGCTAGGATGACCTGGCTCG
#170	CGTGTAGGGTACAAGCTGCCGGCTTCCCACTTTAAT	TT	CATTGCCGTATGGGCTAGGATGACCTGGCTCG	CGTGTAGGGTACAAGCTGCCGGCTTCCCACTTTAATTTCATTGCCGTATGGGCTAGGATGACCTGGCTCG
#170	CTAAACTCCCACATGTGGCCACAGAAACCCACTTTT	TT	CATTGCCGTATGGGCTAGGATGACCTGGCTCG	CTAAACTCCCACATGTGGCCACAGAAACCCACTTTTTTCATTGCCGTATGGGCTAGGATGACCTGGCTCG
#184	ACAGTTTTCATACAGTGGAAATCTGAAGACAGGCAAAAGGC	TT	ACACCCTTGCACGTCGTGGACCTCCTGCGCTA	ACAGTTTTCATACAGTGGAAATCTGAAGACAGGCAAAAGGCTTACACCCTTGCACGTCGTGGACCTCCTGCGCTA
#184	TGCATCAGTTTTGGATTGGGGTTAAAGGAGAAAATAGTGGT	TT	ACACCCTTGCACGTCGTGGACCTCCTGCGCTA	TGCATCAGTTTTGGATTGGGGTTAAAGGAGAAAATAGTGGTTTACACCCTTGCACGTCGTGGACCTCCTGCGCTA
#184	CCTGACTGGAGGGCATTTGGCACATTCTAGGAGAGT	TT	ACACCCTTGCACGTCGTGGACCTCCTGCGCTA	CCTGACTGGAGGGCATTTGGCACATTCTAGGAGAGTTTACACCCTTGCACGTCGTGGACCTCCTGCGCTA
#184	AAGCACGCTTAGTGAAATAACAGTGGACACAATCATAAGGG	TT	ACACCCTTGCACGTCGTGGACCTCCTGCGCTA	AAGCACGCTTAGTGAAATAACAGTGGACACAATCATAAGGGTTACACCCTTGCACGTCGTGGACCTCCTGCGCTA
#184	GGGGAAACCACTGGATGGTATATAATACAGCAGTGACG	TT	ACACCCTTGCACGTCGTGGACCTCCTGCGCTA	GGGGAAACCACTGGATGGTATATAATACAGCAGTGACGTTACACCCTTGCACGTCGTGGACCTCCTGCGCTA
#184	GGGGCTGAGTAAGTAGAAGCACATGAACCAGGCAGG	TT	ACACCCTTGCACGTCGTGGACCTCCTGCGCTA	GGGGCTGAGTAAGTAGAAGCACATGAACCAGGCAGGTTACACCCTTGCACGTCGTGGACCTCCTGCGCTA
#184	AAAAGAGACACTCTGGAAGCTCTGTTGGAATAGACTGTTG	TT	ACACCCTTGCACGTCGTGGACCTCCTGCGCTA	AAAAGAGACACTCTGGAAGCTCTGTTGGAATAGACTGTTGTTACACCCTTGCACGTCGTGGACCTCCTGCGCTA
#184	AGGACAGGGGTAGTGGCAGAAGCAGACCTCATAAAA	TT	ACACCCTTGCACGTCGTGGACCTCCTGCGCTA	AGGACAGGGGTAGTGGCAGAAGCAGACCTCATAAAATTACACCCTTGCACGTCGTGGACCTCCTGCGCTA
#184	CCTGGCTGGGATGGCTCAAATGGTTGTGGGACTATT	TT	ACACCCTTGCACGTCGTGGACCTCCTGCGCTA	CCTGGCTGGGATGGCTCAAATGGTTGTGGGACTATTTTACACCCTTGCACGTCGTGGACCTCCTGCGCTA
#184	ACTTGAAAGGCTGGAGCCTGGAATCATTTGAAACATT	TT	ACACCCTTGCACGTCGTGGACCTCCTGCGCTA	ACTTGAAAGGCTGGAGCCTGGAATCATTTGAAACATTTTACACCCTTGCACGTCGTGGACCTCCTGCGCTA
#184	GGCTACATCAACTAGAGTACTTACATCCGGTCTCTCCA	TT	ACACCCTTGCACGTCGTGGACCTCCTGCGCTA	GGCTACATCAACTAGAGTACTTACATCCGGTCTCTCCATTACACCCTTGCACGTCGTGGACCTCCTGCGCTA
#184	TGACTTGGACTTTTCACAGCGTGGAGGCTGGATTTC	TT	ACACCCTTGCACGTCGTGGACCTCCTGCGCTA	TGACTTGGACTTTTCACAGCGTGGAGGCTGGATTTCTTACACCCTTGCACGTCGTGGACCTCCTGCGCTA
#184	AGGTGAGTGTCTGAAGAGAGACCATCTCGAGAGTTAAC	TT	ACACCCTTGCACGTCGTGGACCTCCTGCGCTA	AGGTGAGTGTCTGAAGAGAGACCATCTCGAGAGTTAACTTACACCCTTGCACGTCGTGGACCTCCTGCGCTA
#184	GCCAAGAGGGAGCTTCTAGAGAGGAGGTGTTCCAAG	TT	ACACCCTTGCACGTCGTGGACCTCCTGCGCTA	GCCAAGAGGGAGCTTCTAGAGAGGAGGTGTTCCAAGTTACACCCTTGCACGTCGTGGACCTCCTGCGCTA
#184	ATTGTGTAGCCTTTTATGACCTTACCTCAGAAGTCAGAGCT	TT	ACACCCTTGCACGTCGTGGACCTCCTGCGCTA	ATTGTGTAGCCTTTTATGACCTTACCTCAGAAGTCAGAGCTTTACACCCTTGCACGTCGTGGACCTCCTGCGCTA
#184	ACTGTATGTATCCTATTGATCAAAGTAGACATGAGCCCACCC	TT	ACACCCTTGCACGTCGTGGACCTCCTGCGCTA	ACTGTATGTATCCTATTGATCAAAGTAGACATGAGCCCACCCTTACACCCTTGCACGTCGTGGACCTCCTGCGCTA
#184	ATAAAAGGGCAGGGAACCTAGACCACAGTTCTTGATG	TT	ACACCCTTGCACGTCGTGGACCTCCTGCGCTA	ATAAAAGGGCAGGGAACCTAGACCACAGTTCTTGATGTTACACCCTTGCACGTCGTGGACCTCCTGCGCTA
#184	AAACTACCACAGATTGAAATACTGTGGCTGAACAGGAATGG	TT	ACACCCTTGCACGTCGTGGACCTCCTGCGCTA	AAACTACCACAGATTGAAATACTGTGGCTGAACAGGAATGGTTACACCCTTGCACGTCGTGGACCTCCTGCGCTA
#184	TCAGGTGCTTATTGATCCTCCGAGTGGAGATATCAAGT	TT	ACACCCTTGCACGTCGTGGACCTCCTGCGCTA	TCAGGTGCTTATTGATCCTCCGAGTGGAGATATCAAGTTTACACCCTTGCACGTCGTGGACCTCCTGCGCTA
#184	GACAGAAGAACAACCAGTAAAGTTGCTCTCTTTTAGGCAGG	TT	ACACCCTTGCACGTCGTGGACCTCCTGCGCTA	GACAGAAGAACAACCAGTAAAGTTGCTCTCTTTTAGGCAGGTTACACCCTTGCACGTCGTGGACCTCCTGCGCTA
#184	AAAAGAGAGTGAACAACTGAGTCAATTGCTGCTGATGGT	TT	ACACCCTTGCACGTCGTGGACCTCCTGCGCTA	AAAAGAGAGTGAACAACTGAGTCAATTGCTGCTGATGGTTTACACCCTTGCACGTCGTGGACCTCCTGCGCTA
#184	ACATTGATTGCAGATGCCCACAATGTTTATGATCTGACTGA	TT	ACACCCTTGCACGTCGTGGACCTCCTGCGCTA	ACATTGATTGCAGATGCCCACAATGTTTATGATCTGACTGATTACACCCTTGCACGTCGTGGACCTCCTGCGCTA
#184	TTATTATAGGTCAACTGAGAATGGCAGAGGACTCATCCCA	TT	ACACCCTTGCACGTCGTGGACCTCCTGCGCTA	TTATTATAGGTCAACTGAGAATGGCAGAGGACTCATCCCATTACACCCTTGCACGTCGTGGACCTCCTGCGCTA
#184	CAGGTGACCTTGCTCGTGCATGTGGATATTTGCTCA	TT	ACACCCTTGCACGTCGTGGACCTCCTGCGCTA	CAGGTGACCTTGCTCGTGCATGTGGATATTTGCTCATTACACCCTTGCACGTCGTGGACCTCCTGCGCTA
#184	ATGTTTCCCACAAAATTGCTTACTCTCTTTCATTCTGTCCGT	TT	ACACCCTTGCACGTCGTGGACCTCCTGCGCTA	ATGTTTCCCACAAAATTGCTTACTCTCTTTCATTCTGTCCGTTTACACCCTTGCACGTCGTGGACCTCCTGCGCTA
#184	TTTTCCCCTCCTATTAACATTTCTGGGGACTCTAAAGCAGA	TT	ACACCCTTGCACGTCGTGGACCTCCTGCGCTA	TTTTCCCCTCCTATTAACATTTCTGGGGACTCTAAAGCAGATTACACCCTTGCACGTCGTGGACCTCCTGCGCTA
#184	GAGAGCGCAAGGAAGGGGAACTACCAAAGCACTTTA	TT	ACACCCTTGCACGTCGTGGACCTCCTGCGCTA	GAGAGCGCAAGGAAGGGGAACTACCAAAGCACTTTATTACACCCTTGCACGTCGTGGACCTCCTGCGCTA
#184	ACGCCCAGCCAATAGTGGAATTGTTGCCGGACAATA	TT	ACACCCTTGCACGTCGTGGACCTCCTGCGCTA	ACGCCCAGCCAATAGTGGAATTGTTGCCGGACAATATTACACCCTTGCACGTCGTGGACCTCCTGCGCTA
#184	AAGAGTAACAGTGTAATTCTGGCTCCTTGAAATTTGAGGGG	TT	ACACCCTTGCACGTCGTGGACCTCCTGCGCTA	AAGAGTAACAGTGTAATTCTGGCTCCTTGAAATTTGAGGGGTTACACCCTTGCACGTCGTGGACCTCCTGCGCTA
#184	TTTTCTGGACATTCGACCAGTGCTTTCTAAATTTCTCCACT	TT	ACACCCTTGCACGTCGTGGACCTCCTGCGCTA	TTTTCTGGACATTCGACCAGTGCTTTCTAAATTTCTCCACTTTACACCCTTGCACGTCGTGGACCTCCTGCGCTA
#184	AGTTTTACAGTTTTGACAGTCATAGGGTTCACCAATCCACC	TT	ACACCCTTGCACGTCGTGGACCTCCTGCGCTA	AGTTTTACAGTTTTGACAGTCATAGGGTTCACCAATCCACCTTACACCCTTGCACGTCGTGGACCTCCTGCGCTA
#184	AGAAGAGAATTAAGTCATGCGGACACAGCAGGGTTT	TT	ACACCCTTGCACGTCGTGGACCTCCTGCGCTA	AGAAGAGAATTAAGTCATGCGGACACAGCAGGGTTTTTACACCCTTGCACGTCGTGGACCTCCTGCGCTA
#184	AATGGATGAGTAGAGGAGTGTGTGCAGGCTCCAGTC	TT	ACACCCTTGCACGTCGTGGACCTCCTGCGCTA	AATGGATGAGTAGAGGAGTGTGTGCAGGCTCCAGTCTTACACCCTTGCACGTCGTGGACCTCCTGCGCTA
#184	CAAAGTCTCTAGGACTGTCCTAGAACCTGCAGCTCA	TT	ACACCCTTGCACGTCGTGGACCTCCTGCGCTA	CAAAGTCTCTAGGACTGTCCTAGAACCTGCAGCTCATTACACCCTTGCACGTCGTGGACCTCCTGCGCTA
#184	ATGCAGATAGATTCAATTGAGAAGGGGAATTCTAGGCTAGGA	TT	ACACCCTTGCACGTCGTGGACCTCCTGCGCTA	ATGCAGATAGATTCAATTGAGAAGGGGAATTCTAGGCTAGGATTACACCCTTGCACGTCGTGGACCTCCTGCGCTA
#184	ACAAGGTTACAGGCAAGGAGACAGGAACATAGCTTG	TT	ACACCCTTGCACGTCGTGGACCTCCTGCGCTA	ACAAGGTTACAGGCAAGGAGACAGGAACATAGCTTGTTACACCCTTGCACGTCGTGGACCTCCTGCGCTA
#184	AAATGTTTGTACAACTTCTCTGTATGGCAATGGGGTAGGA	TT	ACACCCTTGCACGTCGTGGACCTCCTGCGCTA	AAATGTTTGTACAACTTCTCTGTATGGCAATGGGGTAGGATTACACCCTTGCACGTCGTGGACCTCCTGCGCTA
#184	GTAGATCTATATGTCCCATTATGGAACAATCCCCATGGTGGG	TT	ACACCCTTGCACGTCGTGGACCTCCTGCGCTA	GTAGATCTATATGTCCCATTATGGAACAATCCCCATGGTGGGTTACACCCTTGCACGTCGTGGACCTCCTGCGCTA
#184	ATTGCAGATGAGGTTGATGAAGCTTAAAGAGTAATGATGCCT	TT	ACACCCTTGCACGTCGTGGACCTCCTGCGCTA	ATTGCAGATGAGGTTGATGAAGCTTAAAGAGTAATGATGCCTTTACACCCTTGCACGTCGTGGACCTCCTGCGCTA
#184	TTCTCCCTTTTGCATCCCTGTGCTAAAGTGACTTTGC	TT	ACACCCTTGCACGTCGTGGACCTCCTGCGCTA	TTCTCCCTTTTGCATCCCTGTGCTAAAGTGACTTTGCTTACACCCTTGCACGTCGTGGACCTCCTGCGCTA
#184	AGACTTCCTTGCAGGCAGTCTATCAGTGATATCCAATAAAGA	TT	ACACCCTTGCACGTCGTGGACCTCCTGCGCTA	AGACTTCCTTGCAGGCAGTCTATCAGTGATATCCAATAAAGATTACACCCTTGCACGTCGTGGACCTCCTGCGCTA
#184	ACTTCTCCTTTTGTGCCAGGTACTTAGATTAGGTGTAGTGG	TT	ACACCCTTGCACGTCGTGGACCTCCTGCGCTA	ACTTCTCCTTTTGTGCCAGGTACTTAGATTAGGTGTAGTGGTTACACCCTTGCACGTCGTGGACCTCCTGCGCTA
#184	TTATCAAGGTAAACACCACCTCATACATTTCAGCAGAGAGC	TT	ACACCCTTGCACGTCGTGGACCTCCTGCGCTA	TTATCAAGGTAAACACCACCTCATACATTTCAGCAGAGAGCTTACACCCTTGCACGTCGTGGACCTCCTGCGCTA
#184	ACAATGCCACACAGTTGGGCTTTCATGTTAGATAGATCA	TT	ACACCCTTGCACGTCGTGGACCTCCTGCGCTA	ACAATGCCACACAGTTGGGCTTTCATGTTAGATAGATCATTACACCCTTGCACGTCGTGGACCTCCTGCGCTA
#184	GGGGATGGCATTATAAGAGAGGAGACTGGAGACAGG	TT	ACACCCTTGCACGTCGTGGACCTCCTGCGCTA	GGGGATGGCATTATAAGAGAGGAGACTGGAGACAGGTTACACCCTTGCACGTCGTGGACCTCCTGCGCTA
#184	GGCTATTGTCATGCAGATTTGTTGGATGTCCACCCA	TT	ACACCCTTGCACGTCGTGGACCTCCTGCGCTA	GGCTATTGTCATGCAGATTTGTTGGATGTCCACCCATTACACCCTTGCACGTCGTGGACCTCCTGCGCTA
#184	TTTTCCATCTTTTGCCAGGGGTACACTACACAACATCA	TT	ACACCCTTGCACGTCGTGGACCTCCTGCGCTA	TTTTCCATCTTTTGCCAGGGGTACACTACACAACATCATTACACCCTTGCACGTCGTGGACCTCCTGCGCTA
#184	TTCATAGAATGGCAATTAGATTAGGCTTAGGTCTGCACTGC	TT	ACACCCTTGCACGTCGTGGACCTCCTGCGCTA	TTCATAGAATGGCAATTAGATTAGGCTTAGGTCTGCACTGCTTACACCCTTGCACGTCGTGGACCTCCTGCGCTA
#184	TCCTTCACTCCGCTCTGTCACTTGCCATCATTGTAA	TT	ACACCCTTGCACGTCGTGGACCTCCTGCGCTA	TCCTTCACTCCGCTCTGTCACTTGCCATCATTGTAATTACACCCTTGCACGTCGTGGACCTCCTGCGCTA
#184	CCCCACCCATTAATACCTGACTCCTTTGCAAAACAAA	TT	ACACCCTTGCACGTCGTGGACCTCCTGCGCTA	CCCCACCCATTAATACCTGACTCCTTTGCAAAACAAATTACACCCTTGCACGTCGTGGACCTCCTGCGCTA
#184	AAAAGGGGCAAGAGTTGGCCAGTTTGACACTTCCTT	TT	ACACCCTTGCACGTCGTGGACCTCCTGCGCTA	AAAAGGGGCAAGAGTTGGCCAGTTTGACACTTCCTTTTACACCCTTGCACGTCGTGGACCTCCTGCGCTA
#184	ATTTCTTCTCTGAGAGTATGCAATTTGTCTGATGTGTTGCCT	TT	ACACCCTTGCACGTCGTGGACCTCCTGCGCTA	ATTTCTTCTCTGAGAGTATGCAATTTGTCTGATGTGTTGCCTTTACACCCTTGCACGTCGTGGACCTCCTGCGCTA
#184	GGGGTGAAGAAAGCATTCCATGAGTGGGACTGTATG	TT	ACACCCTTGCACGTCGTGGACCTCCTGCGCTA	GGGGTGAAGAAAGCATTCCATGAGTGGGACTGTATGTTACACCCTTGCACGTCGTGGACCTCCTGCGCTA
#184	CAATGGAGAAAAGTCATGAAGGAAAGATGGCATTCCATGTG	TT	ACACCCTTGCACGTCGTGGACCTCCTGCGCTA	CAATGGAGAAAAGTCATGAAGGAAAGATGGCATTCCATGTGTTACACCCTTGCACGTCGTGGACCTCCTGCGCTA
#184	AGAGTATGAGCTTTTAGAGGGGAAGAAAAGTATCCTCTTCCC	TT	ACACCCTTGCACGTCGTGGACCTCCTGCGCTA	AGAGTATGAGCTTTTAGAGGGGAAGAAAAGTATCCTCTTCCCTTACACCCTTGCACGTCGTGGACCTCCTGCGCTA
#184	AAGCATTCAGAGCATCTAGTATCACACTTGGGATATAGCAGG	TT	ACACCCTTGCACGTCGTGGACCTCCTGCGCTA	AAGCATTCAGAGCATCTAGTATCACACTTGGGATATAGCAGGTTACACCCTTGCACGTCGTGGACCTCCTGCGCTA
#184	AGAATGTGATTAAATAACTTTGAGGGCCCACATGGATGACT	TT	ACACCCTTGCACGTCGTGGACCTCCTGCGCTA	AGAATGTGATTAAATAACTTTGAGGGCCCACATGGATGACTTTACACCCTTGCACGTCGTGGACCTCCTGCGCTA
#184	GGATCAAAAGTTTGGACTTAGCTTGTCAGTAATGAGGAGCC	TT	ACACCCTTGCACGTCGTGGACCTCCTGCGCTA	GGATCAAAAGTTTGGACTTAGCTTGTCAGTAATGAGGAGCCTTACACCCTTGCACGTCGTGGACCTCCTGCGCTA
#184	AGTAAAATGGAAACCTTGAGCAAAGGTAGGCTAGTTAGGAGT	TT	ACACCCTTGCACGTCGTGGACCTCCTGCGCTA	AGTAAAATGGAAACCTTGAGCAAAGGTAGGCTAGTTAGGAGTTTACACCCTTGCACGTCGTGGACCTCCTGCGCTA
#184	AAAAGCAGGTGCAGAAAACATTCAGAGGAGGAAACAA	TT	ACACCCTTGCACGTCGTGGACCTCCTGCGCTA	AAAAGCAGGTGCAGAAAACATTCAGAGGAGGAAACAATTACACCCTTGCACGTCGTGGACCTCCTGCGCTA
#184	AAAGTCAAAGATAACTGGGATTTTAATCCTGAGCAACGGGT	TT	ACACCCTTGCACGTCGTGGACCTCCTGCGCTA	AAAGTCAAAGATAACTGGGATTTTAATCCTGAGCAACGGGTTTACACCCTTGCACGTCGTGGACCTCCTGCGCTA
#184	GCTAGTGAGACATCTAATCACTCTCCCCGTCTCCTT	TT	ACACCCTTGCACGTCGTGGACCTCCTGCGCTA	GCTAGTGAGACATCTAATCACTCTCCCCGTCTCCTTTTACACCCTTGCACGTCGTGGACCTCCTGCGCTA
#184	AAAAGCATTAGCCAGAAGTCAGCATGTTTACATCAGTTCCT	TT	ACACCCTTGCACGTCGTGGACCTCCTGCGCTA	AAAAGCATTAGCCAGAAGTCAGCATGTTTACATCAGTTCCTTTACACCCTTGCACGTCGTGGACCTCCTGCGCTA
#184	CAAGACAGGTGCTGCACACACTGGATTACAGCATGG	TT	ACACCCTTGCACGTCGTGGACCTCCTGCGCTA	CAAGACAGGTGCTGCACACACTGGATTACAGCATGGTTACACCCTTGCACGTCGTGGACCTCCTGCGCTA
#184	CCCAGCAAGTGGCAAAATATGGGCACCTTGACCTAC	TT	ACACCCTTGCACGTCGTGGACCTCCTGCGCTA	CCCAGCAAGTGGCAAAATATGGGCACCTTGACCTACTTACACCCTTGCACGTCGTGGACCTCCTGCGCTA
#184	GAGACTGTTTCTATTCCATAGTGGATGCTCCATCCAACAC	TT	ACACCCTTGCACGTCGTGGACCTCCTGCGCTA	GAGACTGTTTCTATTCCATAGTGGATGCTCCATCCAACACTTACACCCTTGCACGTCGTGGACCTCCTGCGCTA
#184	TAAAGTGCGCACATCTGATCACTTTCCAAGTATAAATGGCC	TT	ACACCCTTGCACGTCGTGGACCTCCTGCGCTA	TAAAGTGCGCACATCTGATCACTTTCCAAGTATAAATGGCCTTACACCCTTGCACGTCGTGGACCTCCTGCGCTA
#184	GATTTCTAAAGACTGTGAACTCAACCCACATAAGAGGAGGC	TT	ACACCCTTGCACGTCGTGGACCTCCTGCGCTA	GATTTCTAAAGACTGTGAACTCAACCCACATAAGAGGAGGCTTACACCCTTGCACGTCGTGGACCTCCTGCGCTA
#184	TCCAGTTCCTCAACAAATGGAAGATGGAATTTTCCAGTTCT	TT	ACACCCTTGCACGTCGTGGACCTCCTGCGCTA	TCCAGTTCCTCAACAAATGGAAGATGGAATTTTCCAGTTCTTTACACCCTTGCACGTCGTGGACCTCCTGCGCTA
#184	CCCCTGCTCTGTCTCTAGTTTGTGACATGATGCTGA	TT	ACACCCTTGCACGTCGTGGACCTCCTGCGCTA	CCCCTGCTCTGTCTCTAGTTTGTGACATGATGCTGATTACACCCTTGCACGTCGTGGACCTCCTGCGCTA
#184	GCATGTCTGTTAGTGTGTAGGTGACGCTGCCTTCAG	TT	ACACCCTTGCACGTCGTGGACCTCCTGCGCTA	GCATGTCTGTTAGTGTGTAGGTGACGCTGCCTTCAGTTACACCCTTGCACGTCGTGGACCTCCTGCGCTA
#184	AGAAGCTGGATTCAACAACATTAGGCTGACTTGCAG	TT	ACACCCTTGCACGTCGTGGACCTCCTGCGCTA	AGAAGCTGGATTCAACAACATTAGGCTGACTTGCAGTTACACCCTTGCACGTCGTGGACCTCCTGCGCTA
#184	TACAAAGCCTCTGACTAAGGTCATCACATCTGGCAC	TT	ACACCCTTGCACGTCGTGGACCTCCTGCGCTA	TACAAAGCCTCTGACTAAGGTCATCACATCTGGCACTTACACCCTTGCACGTCGTGGACCTCCTGCGCTA
#184	GATTTGATGTCAGGAGCTGATGTTCTTTTCACCTTCTTCCC	TT	ACACCCTTGCACGTCGTGGACCTCCTGCGCTA	GATTTGATGTCAGGAGCTGATGTTCTTTTCACCTTCTTCCCTTACACCCTTGCACGTCGTGGACCTCCTGCGCTA
#184	TTCTAAGGATATTATACAGTGGCATCGTGCTGACTTAGGCT	TT	ACACCCTTGCACGTCGTGGACCTCCTGCGCTA	TTCTAAGGATATTATACAGTGGCATCGTGCTGACTTAGGCTTTACACCCTTGCACGTCGTGGACCTCCTGCGCTA
#184	GCAGTGACAAATTTAATGTTACTTCACCTCTGCCAGGG	TT	ACACCCTTGCACGTCGTGGACCTCCTGCGCTA	GCAGTGACAAATTTAATGTTACTTCACCTCTGCCAGGGTTACACCCTTGCACGTCGTGGACCTCCTGCGCTA
#184	TCTGAACTGCAAACCTGGTTGCATTAACAAGAATAGTATGGG	TT	ACACCCTTGCACGTCGTGGACCTCCTGCGCTA	TCTGAACTGCAAACCTGGTTGCATTAACAAGAATAGTATGGGTTACACCCTTGCACGTCGTGGACCTCCTGCGCTA
#184	TGAAGGTCACAAATTTCTTCTGTCTAAGGATCCTTGGAATGG	TT	ACACCCTTGCACGTCGTGGACCTCCTGCGCTA	TGAAGGTCACAAATTTCTTCTGTCTAAGGATCCTTGGAATGGTTACACCCTTGCACGTCGTGGACCTCCTGCGCTA
