# Supplementary material for: Human Papillomavirus 42 Drives Digital Papillary Adenocarcinoma and Elicits a Germ Cell–like Program Conserved in HPV-Positive Cancers
Source: Cancer Discov. 2022 Oct 10;13(1):70–84. doi: 10.1158/2159-8290.CD-22-0489 (PMC9827110; doi:10.1158/2159-8290.CD-22-0489)
Supplement: Supplementary Table S8 — HPV42- and HPV16-E6 BioID. [file cd-22-0489_supplementary_table_s8_suppst8.xlsx]

## Sheet: Supplementary Table S8
Supplementary Table S8: BioID data of HPV42-E6 and HPV16-E6
N-terminal BioID tag HPV42-E6								N-terminal BioID tag HPV16-E6
Uniprot	Gene	Full names	log2fc	q-value				Uniprot	Gene	Full names	log2fc	q-value
Q05086	UBE3A	Ubiquitin-protein ligase E3A	7.62533	0				Q6NS38	ALKBH2	Alpha-ketoglutarate-dependent dioxygenase alkB homolog 2	7.83986	0.000594752
O00186	STXBP3	Syntaxin-binding protein 3	5.98892	0				Q86U06	RBM23	Probable RNA-binding protein 23	6.87409	0
O75420	GIGYF1	PERQ amino acid-rich with GYF domain-containing protein 1	5.40162	0.000214765				Q9UGM6	WARS2	Tryptophan--tRNA ligase, mitochondrial	5.95999	0.00103371
Q9Y6H1	CHCHD2	Coiled-coil-helix-coiled-coil-helix domain-containing protein 2	5.32558	0				Q92585	MAML1	Mastermind-like protein 1	5.5974	0.000592593
Q00587	CDC42EP1	Cdc42 effector protein 1	5.05911	0.00368377				Q9BXK1	KLF16	Krueppel-like factor 16	5.56416	0.000548387
Q7LBR1	CHMP1B	Charged multivesicular body protein 1b	4.99008	0.000145015				Q9H6K5	PRR36	Proline-rich protein 36	5.52229	0.00229888
Q12923	PTPN13	Tyrosine-protein phosphatase non-receptor type 13	4.34317	0				Q93077	HIST1H2AC	Histone H2A type 1-C	5.2466	0.00085281
P05204	HMGN2	Non-histone chromosomal protein HMG-17	4.16391	0.000180451				Q9Y530	OARD1	O-acetyl-ADP-ribose deacetylase 1	5.22513	0.0011835
Q13033	STRN3	Striatin-3	3.79265	0				Q9H5H4	ZNF768	Zinc finger protein 768	5.00885	0.000841549
Q8TAA9	VANGL1	Vang-like protein 1	3.76289	0				Q96EY4	TMA16	Translation machinery-associated protein 16	4.84233	0.00101711
Q93077	HIST1H2AC	Histone H2A type 1-C	3.57701	0.00254692				Q969Q0	RPL36AL	60S ribosomal protein L36a-like	4.80912	0.00103226
Q9BXK1	KLF16	Krueppel-like factor 16	3.57274	0.000116931				P49674	CSNK1E	Casein kinase I isoform epsilon	4.69058	0.000442516
Q15643	TRIP11	Thyroid receptor-interacting protein 11	3.51854	0.000179439				P23511	NFYA	Nuclear transcription factor Y subunit alpha	4.53724	0.00116201
Q7L3S4	ZNF771	Zinc finger protein 771	3.50661	0.000119701				O43920	NDUFS5	NADH dehydrogenase [ubiquinone] iron-sulfur protein 5	4.43093	0.0010095
Q86YM7	HOMER1	Homer protein homolog 1	3.49094	0.000161616				Q86XJ1	GAS2L3	GAS2-like protein 3	4.41293	0.000913085
P55145	MANF	Mesencephalic astrocyte-derived neurotrophic factor	3.42177	0.00329692				Q86YM7	HOMER1	Homer protein homolog 1	4.36283	0.000686192
Q9Y530	OARD1	O-acetyl-ADP-ribose deacetylase 1	3.41547	0.000341379				Q5T280	C9orf114	Putative methyltransferase C9orf114	4.32447	0.000538259
P82912	MRPS11	28S ribosomal protein S11, mitochondrial	3.36115	0.000248705				O60294	LCMT2	tRNA wybutosine-synthesizing protein 4	4.19133	0.00113351
Q9NRA8	EIF4ENIF1	Eukaryotic translation initiation factor 4E transporter	3.34275	0.00020339				Q6P087	RPUSD3	RNA pseudouridylate synthase domain-containing protein 3	4.08942	0.000466819
O60645	EXOC3	Exocyst complex component 3	3.27368	0				Q99569	PKP4	Plakophilin-4	4.04023	0.000936791
Q8N0Z3	SPICE1	Spindle and centriole-associated protein 1	3.25493	0.00288573				Q86U90	YRDC	YrdC domain-containing protein, mitochondrial	4.03648	0.000489796
Q9NZW5	MPP6	MAGUK p55 subfamily member 6	3.2539	0.000406276				P82912	MRPS11	28S ribosomal protein S11, mitochondrial	4.02234	0.000690526
Q04721	NOTCH2	Neurogenic locus notch homolog protein 2	3.1852	0.00161155				Q9H7H0	METTL17	Methyltransferase-like protein 17, mitochondrial	3.99028	0.00133808
Q9HCM4	EPB41L5	Band 4,1-like protein 5	3.03431	0.000193939				Q7L3S4	ZNF771	Zinc finger protein 771	3.93527	0.00102843
O14545	TRAFD1	TRAF-type zinc finger domain-containing protein 1	2.9717	0.000181303				P16403	HIST1H1C	Histone H1.2	3.92893	0.000711111
Q9NNW5	WDR6	WD repeat-containing protein 6	2.96828	0.000210526				Q9UBP0	SPAST	Spastin	3.91763	0.00135544
Q9HB21	PLEKHA1	Pleckstrin homology domain-containing family A member 1	2.94335	0				Q9BXS6	NUSAP1	Nucleolar and spindle-associated protein 1	3.89666	0.00068
P27986	PIK3R1	Phosphatidylinositol 3-kinase regulatory subunit alpha	2.82875	0.00324271				Q6ZSJ8	C1orf122	Uncharacterized protein C1orf122	3.86805	0.000744526
Q9HDC9	APMAP	Adipocyte plasma membrane-associated protein	2.82123	0.000261106				Q9NWT8	AURKAIP1	Aurora kinase A-interacting protein	3.81507	0.00558461
Q02487	DSC2	Desmocollin-2	2.77277	0.000176147				Q8WUU5	GATAD1	GATA zinc finger domain-containing protein 1	3.72804	0.0014143
Q59GN2	RPL39P5	Putative 60S ribosomal protein L39-like 5	2.74059	0				Q08426	EHHADH	Peroxisomal bifunctional enzyme	3.7267	0.000391837
Q9Y2G0	EFR3B	Protein EFR3 homolog B	2.73375	0.00192883				O43633	CHMP2A	Charged multivesicular body protein 2a	3.71592	0.000874275
Q9UJF2	RASAL2	Ras GTPase-activating protein nGAP	2.73168	0.000678489				Q96Q83	ALKBH3	Alpha-ketoglutarate-dependent dioxygenase alkB homolog 3	3.68307	0.00136094
P22307	SCP2	Non-specific lipid-transfer protein	2.70839	0.000144578				Q14554	PDIA5	Protein disulfide-isomerase A5	3.60904	0.00972072
Q68DC2	ANKS6	Ankyrin repeat and SAM domain-containing protein 6	2.70727	0.000606811				Q9BY77	POLDIP3	Polymerase delta-interacting protein 3	3.58112	0.000842105
Q9Y4X0	AMMECR1	AMME syndrome candidate gene 1 protein	2.67506	0.00304889				Q96HQ2	CDKN2AIPNL	CDKN2AIP N-terminal-like protein	3.55914	0.000877064
Q96EY4	TMA16	Translation machinery-associated protein 16	2.63758	0.000891381				O75382	TRIM3	Tripartite motif-containing protein 3	3.51526	0.000996872
Q9Y3A3	MOB4	MOB-like protein phocein	2.58243	0				P14635	CCNB1	G2/mitotic-specific cyclin-B1	3.50318	0.000482412
P16403	HIST1H1C	Histone H1,2	2.56169	0.000330827				Q6PGN9	PSRC1	Proline/serine-rich coiled-coil protein 1	3.46207	0.000889764
Q16763	UBE2S	Ubiquitin-conjugating enzyme E2 S	2.51102	0.00067433				Q8IYB8	SUPV3L1	ATP-dependent RNA helicase SUPV3L1, mitochondrial	3.42974	0.000949877
A4D1E9	GTPBP10	GTP-binding protein 10	2.4825	0.0006125				P20719	HOXA5	Homeobox protein Hox-A5	3.40483	0
Q2KHM9	KIAA0753	Uncharacterized protein KIAA0753	2.45462	0.000405941				Q8N1G4	LRRC47	Leucine-rich repeat-containing protein 47	3.30976	0.000766917
Q86X29	LSR	Lipolysis-stimulated lipoprotein receptor	2.41558	0.000128171				P40939	HADHA	Trifunctional enzyme subunit alpha, mitochondrial	3.27047	0.00889194
P0CG12	CHTF8	Chromosome transmission fidelity protein 8 homolog isoform 2	2.28036	0				Q8NC60	NOA1	Nitric oxide-associated protein 1	3.26349	0.000985612
Q9Y2I1	NISCH	Nischarin	2.26585	0.00011497				Q96CB9	NSUN4	5-methylcytosine rRNA methyltransferase NSUN4	3.16305	0.0023488
Q14126	DSG2	Desmoglein-2	2.24785	0				Q96BZ8	LENG1	Leukocyte receptor cluster member 1	3.15573	0.00398311
Q969Q0	RPL36AL	60S ribosomal protein L36a-like	2.24671	0.000240602				Q9H7E9	C8orf33	UPF0488 protein C8orf33	3.10434	0.000943673
P49674	CSNK1E	Casein kinase I isoform epsilon	2.2325	0.000339914				Q16763	UBE2S	Ubiquitin-conjugating enzyme E2 S	3.10357	0.000867514
Q8IZQ5	SELH	Selenoprotein H	2.21705	0.000109714				Q59GN2	RPL39P5	Putative 60S ribosomal protein L39-like 5	3.06167	0.000450331
Q9UM13	ANAPC10	Anaphase-promoting complex subunit 10	2.21077	0.000204038				Q9UNZ5	C19orf53	Leydig cell tumor 10 kDa protein homolog	3.0565	0.00162646
P30084	ECHS1	Enoyl-CoA hydratase, mitochondrial	2.17546	0.000107744				Q9H6W3	NO66	Bifunctional lysine-specific demethylase and histidyl-hydroxylase NO66	3.04701	0.000488038
P29317	EPHA2	Ephrin type-A receptor 2	2.17023	0.000165803				Q8WWK9	CKAP2	Cytoskeleton-associated protein 2	3.03202	0.000512563
P55036	PSMD4	26S proteasome non-ATPase regulatory subunit 4	2.11049	0.000183206				Q86TN4	TRPT1	tRNA 2-phosphotransferase 1	2.99782	0.000872606
O43633	CHMP2A	Charged multivesicular body protein 2a	2.10694	0.000464598				P13051	UNG	Uracil-DNA glycosylase	2.9755	0.000896825
Q96S44	TP53RK	TP53-regulating kinase	2.09594	0.000404273				Q6DCA0	AMMECR1L	AMMECR1-like protein	2.96864	0.00330586
P48730	CSNK1D	Casein kinase I isoform delta	2.09261	0.00164646				Q6P6C2	ALKBH5	RNA demethylase ALKBH5	2.9421	0.000561404
Q9Y4J8	DTNA	Dystrobrevin alpha	2.0811	0.000111111				Q13825	AUH	Methylglutaconyl-CoA hydratase, mitochondrial	2.92218	0.00278679
Q8N0T1	C8orf59	Uncharacterized protein C8orf59	2.07855	0.00025876				Q9BW19	KIFC1	Kinesin-like protein KIFC1	2.90684	0.000607143
P62857	RPS28	40S ribosomal protein S28	2.06664	0.00115926				P29372	MPG	DNA-3-methyladenine glycosylase	2.82113	0.000747253
Q9H7E9	C8orf33	UPF0488 protein C8orf33	2.04177	0.00226015				Q9BRJ2	MRPL45	39S ribosomal protein L45, mitochondrial	2.81617	0.000990674
P62861	FAU	40S ribosomal protein S30	2.0259	0.000178605				Q05707	COL14A1	Collagen alpha-1(XIV) chain	2.80831	0.0010653
Q9BXS6	NUSAP1	Nucleolar and spindle-associated protein 1	2.00785	0.000138528				P78549	NTHL1	Endonuclease III-like protein 1	2.77914	0.00278368
Q12802	AKAP13	A-kinase anchor protein 13	2.00488	0.00305568				P0CG12	CHTF8	Chromosome transmission fidelity protein 8 homolog isoform 2	2.75407	0.000755556
								Q9Y314	NOSIP	Nitric oxide synthase-interacting protein	2.70877	0.000390244
								Q6NUQ4	TMEM214	Transmembrane protein 214	2.6889	0.00131065
								Q01970	PLCB3	1-phosphatidylinositol 4,5-bisphosphate phosphodiesterase beta-3	2.66985	0.00103351
								Q08379	GOLGA2	Golgin subfamily A member 2	2.66819	0.0021699
								Q7Z422	SZRD1	SUZ domain-containing protein 1	2.66754	0.000677741
								Q05D32	CTDSPL2	CTD small phosphatase-like protein 2	2.65378	0.00102239
								Q8N5I2	ARRDC1	Arrestin domain-containing protein 1	2.62588	0.00104093
								P48730	CSNK1D	Casein kinase I isoform delta	2.61537	0.00103932
								Q9NYZ3	GTSE1	G2 and S phase-expressed protein 1	2.59921	0.000982079
								Q92785	DPF2	Zinc finger protein ubi-d4	2.56607	0.00106258
								P62857	RPS28	40S ribosomal protein S28	2.54383	0.00131837
								Q9P2W1	PSMC3IP	Homologous-pairing protein 2 homolog	2.52729	0.00329158
								O14965	AURKA	Aurora kinase A	2.52281	0.001
								Q5VTU8	ATP5EP2	ATP synthase subunit epsilon-like protein, mitochondrial	2.51802	0.000596273
								P62861	FAU	40S ribosomal protein S30	2.50545	0.00107175
								Q9P016	THYN1	Thymocyte nuclear protein 1	2.49512	0.000568245
								Q96T60	PNKP	Bifunctional polynucleotide phosphatase/kinase	2.47901	0.000923077
								Q52LJ0	FAM98B	Protein FAM98B	2.46172	0.00109763
								Q9Y5J1	UTP18	U3 small nucleolar RNA-associated protein 18 homolog	2.4581	0.000484848
								P63173	RPL38	60S ribosomal protein L38	2.44327	0.000881919
								Q12802	AKAP13	A-kinase anchor protein 13	2.42645	0.0017421
								Q15004	KIAA0101	PCNA-associated factor	2.42224	0.0013467
								Q96CT7	CCDC124	Coiled-coil domain-containing protein 124	2.42084	0.000902196
								O75940	SMNDC1	Survival of motor neuron-related-splicing factor 30	2.41178	0.000470046
								Q12834	CDC20	Cell division cycle protein 20 homolog	2.40689	0.0010304
								O60869	EDF1	Endothelial differentiation-related factor 1	2.39779	0.000723404
								Q9NYP3	DONSON	Protein downstream neighbor of Son	2.36439	0.000892624
								Q8NBL1	POGLUT1	Protein O-glucosyltransferase 1	2.35176	0.00145939
								O95997	PTTG1	Securin	2.33219	0.000900398
								O00178	GTPBP1	GTP-binding protein 1	2.32938	0.00060177
								Q96EU6	RRP36	Ribosomal RNA processing protein 36 homolog	2.32148	0.00130582
								Q6P1N0	CC2D1A	Coiled-coil and C2 domain-containing protein 1A	2.30172	0.00049635
								P37108	SRP14	Signal recognition particle 14 kDa protein	2.29336	0.00105752
								Q6P1L8	MRPL14	39S ribosomal protein L14, mitochondrial	2.27882	0.00104139
								Q8IUF8	MINA	Bifunctional lysine-specific demethylase and histidyl-hydroxylase MINA	2.27842	0.000608955
								P19404	NDUFV2	NADH dehydrogenase [ubiquinone] flavoprotein 2, mitochondrial	2.27328	0.00103128
								Q9UPN3	MACF1	Microtubule-actin cross-linking factor 1, isoforms 1/2/3/5	2.23613	0.000960804
								P62841	RPS15	40S ribosomal protein S15	2.2258	0.00134574
								P08708	RPS17	40S ribosomal protein S17	2.21942	0.00107865
								P54198	HIRA	Protein HIRA	2.20131	0.00876295
								Q9UQ13	SHOC2	Leucine-rich repeat protein SHOC-2	2.19036	0.000935154
								Q14444	CAPRIN1	Caprin-1	2.18846	0.000951389
								Q99986	VRK1	Serine/threonine-protein kinase VRK1	2.17048	0.00102128
								Q9UMY1	NOL7	Nucleolar protein 7	2.16851	0.000849778
								Q14244	MAP7	Ensconsin	2.16336	0.000901316
								Q5T2T1	MPP7	MAGUK p55 subfamily member 7	2.16268	0.000619355
								Q96S44	TP53RK	TP53-regulating kinase	2.15392	0.000947541
								Q99816	TSG101	Tumor susceptibility gene 101 protein	2.13598	0.000849558
								O75330	HMMR	Hyaluronan mediated motility receptor	2.13169	0.000927255
								O95486	SEC24A	Protein transport protein Sec24A	2.12528	0
								Q96E11	MRRF	Ribosome-recycling factor, mitochondrial	2.12238	0.00089597
								O15264	MAPK13	Mitogen-activated protein kinase 13	2.11188	0.000838596
								P62263	RPS14	40S ribosomal protein S14	2.11111	0.000968568
								Q9Y3Y2	CHTOP	Chromatin target of PRMT1 protein	2.11079	0.000769811
								Q9H9H4	VPS37B	Vacuolar protein sorting-associated protein 37B	2.10801	0.00085894
								O43148	RNMT	mRNA cap guanine-N7 methyltransferase	2.07188	0.000428571
								Q7Z7K6	CENPV	Centromere protein V	2.06905	0.000939966
								P26373	RPL13	60S ribosomal protein L13	2.06901	0.000465753
								O15213	WDR46	WD repeat-containing protein 46	2.05982	0.000490385
								O43709	WBSCR22	Probable 18S rRNA (guanine-N(7))-methyltransferase	2.03816	0.00099284
								Q9NV56	MRGBP	MRG/MORF4L-binding protein	2.03671	0.000996904
								P62249	RPS16	40S ribosomal protein S16	2.01849	0.00105584
								P98179	RBM3	RNA-binding protein 3	2.0142	0.00069936
								P61221	ABCE1	ATP-binding cassette sub-family E member 1	2.01395	0.00096988
								Q5VTR2	RNF20	E3 ubiquitin-protein ligase BRE1A	2.01233	0.0010094
								Q8IZQ5	SELH	Selenoprotein H	2.01174	0.000901887
								Q15437	SEC23B	Protein transport protein Sec23B	2.00708	0.00101836
								P84098	RPL19	60S ribosomal protein L19	2.00061	0.000811545
