# Supplementary material for: Human Papillomavirus 42 Drives Digital Papillary Adenocarcinoma and Elicits a Germ Cell–like Program Conserved in HPV-Positive Cancers
Source: Cancer Discov. 2022 Oct 10;13(1):70–84. doi: 10.1158/2159-8290.CD-22-0489 (PMC9827110; doi:10.1158/2159-8290.CD-22-0489)
Supplement: Supplementary Table S11 — DEG HPV+ vs. HPV- CESC/HNSCC. [file cd-22-0489_supplementary_table_s11_suppst11.xlsx]

## Sheet: Supplementary Table S11
Supplementary Table S11: Differentially expressed protein-coding genes between HPV+ and HPV- CESC and HNSCC
ENSEMBL	CESC log2FC(HPV+/HPV-)	CESC padj	HNSCC log2FC(HPV+/HPV-)	HNSCC padj	Gene symbol
ENSG00000006062	1.0723	1.80088e-07	1.2052	8.03581e-30	MAP3K14
ENSG00000007171	1.17337	0.00374883	3.78815	1.78598e-36	NOS2
ENSG00000007372	1.5765	1.75217e-06	1.44088	4.74701e-16	PAX6
ENSG00000007933	4.58814	3.98732e-07	2.44348	1.06019e-13	FMO3
ENSG00000008300	1.20681	2.17182e-05	1.19409	2.44511e-10	CELSR3
ENSG00000016082	1.4092	0.00839663	2.75988	2.02023e-15	ISL1
ENSG00000023445	2.62997	4.28073e-08	1.47171	5.75349e-12	BIRC3
ENSG00000039600	3.62056	1.82974e-19	3.77558	8.5861e-69	SOX30
ENSG00000049246	1.14541	4.49359e-05	1.14775	1.44188e-15	PER3
ENSG00000054796	1.94938	0.015374	3.00813	0.00216661	SPO11
ENSG00000066923	2.68695	3.44147e-09	4.57709	9.25098e-141	STAG3
ENSG00000073111	1.07759	4.3118e-12	1.57507	4.10253e-59	MCM2
ENSG00000075073	1.99977	2.47025e-11	1.49487	1.3443e-23	TACR2
ENSG00000077800	2.37038	2.00196e-05	2.5318	3.0588e-27	FKBP6
ENSG00000077935	3.48596	2.93935e-21	5.51318	1.24392e-124	SMC1B
ENSG00000078900	1.58754	2.79238e-09	1.22687	2.65319e-22	TP73
ENSG00000079435	1.05412	1.83948e-05	1.68508	4.17143e-34	LIPE
ENSG00000081052	1.38164	0.00426324	2.84487	8.23957e-36	COL4A4
ENSG00000089558	1.80315	5.90604e-06	1.10127	1.54499e-07	KCNH4
ENSG00000089820	1.47181	9.51687e-09	1.97445	1.79402e-38	ARHGAP4
ENSG00000090376	1.02524	0.00158483	1.22201	1.10109e-14	IRAK3
ENSG00000092470	1.39749	1.00526e-22	1.44438	2.67115e-50	WDR76
ENSG00000094755	1.20906	0.0216529	1.99017	4.79524e-08	GABRP
ENSG00000095777	3.94983	4.52782e-11	3.69931	2.01597e-26	MYO3A
ENSG00000099769	1.24833	0.000247826	1.99966	7.71029e-27	IGFALS
ENSG00000099840	1.11285	0.000823966	1.01215	2.34949e-10	IZUMO4
ENSG00000099958	1.03753	1.26754e-10	1.3892	1.87389e-10	DERL3
ENSG00000100024	4.32919	1.42859e-16	4.91873	4.51153e-117	UPB1
ENSG00000100033	1.47317	7.53573e-05	1.30023	2.02293e-11	PRODH
ENSG00000100156	1.29604	3.5557e-05	1.71036	2.79091e-15	SLC16A8
ENSG00000100297	1.20161	7.06907e-19	1.24391	1.23635e-54	MCM5
ENSG00000100721	1.48293	0.0126352	1.02124	0.000950093	TCL1A
ENSG00000102387	3.32803	3.99789e-09	5.85489	6.66475e-177	TAF7L
ENSG00000104921	1.05331	0.023836	1.85722	2.52159e-08	FCER2
ENSG00000105011	1.13545	3.87964e-12	1.46781	1.80901e-54	ASF1B
ENSG00000105131	1.69328	0.000116421	1.28183	9.22449e-06	EPHX3
ENSG00000105278	5.80051	1.00737e-28	5.88619	1.75789e-79	ZFR2
ENSG00000106633	1.73474	0.00155667	2.90906	4.90964e-39	GCK
ENSG00000106689	2.23078	5.28711e-09	1.83594	4.01729e-13	LHX2
ENSG00000107954	1.00469	0.022652	1.76907	1.39697e-15	NEURL1
ENSG00000109193	2.78808	2.43726e-07	1.8877	1.52695e-08	SULT1E1
ENSG00000111732	1.12184	0.0212797	1.20868	0.000118822	AICDA
ENSG00000111879	1.53714	4.97966e-06	2.10128	4.53766e-26	FAM184A
ENSG00000112238	1.42143	6.55542e-06	1.07985	0.00194768	PRDM13
ENSG00000114547	1.05928	0.0204117	1.11273	0.000139189	ROPN1B
ENSG00000115297	1.78113	2.51013e-06	2.38264	4.25073e-20	TLX2
ENSG00000116824	1.03964	0.00308138	1.05226	1.27658e-08	CD2
ENSG00000118156	3.8704	5.87887e-17	4.64017	3.56009e-65	ZNF541
ENSG00000118160	1.47855	0.00876382	2.21672	1.64631e-13	SLC8A2
ENSG00000119919	2.7483	4.32573e-08	3.20321	3.77259e-18	NKX2-3
ENSG00000123080	1.61612	2.386e-09	2.54082	1.32756e-90	CDKN2C
ENSG00000123219	1.05677	1.28571e-09	1.36405	6.08069e-33	CENPK
ENSG00000123977	2.46971	3.79198e-05	1.42619	8.62616e-11	DAW1
ENSG00000124134	4.22046	9.86241e-22	3.23289	1.12529e-24	KCNS1
ENSG00000124635	1.62732	8.99843e-07	1.13751	7.34781e-11	H2BC11
ENSG00000124657	1.59202	4.51778e-05	1.44796	1.62969e-08	OR2B6
ENSG00000124678	2.59152	1.03642e-12	4.07893	2.06065e-39	TCP11
ENSG00000125355	1.48806	0.000905048	1.51582	2.09257e-13	TMEM255A
ENSG00000126353	1.7865	9.10063e-07	1.00892	4.76616e-07	CCR7
ENSG00000127561	1.76874	3.36216e-07	2.851	3.12852e-47	SYNGR3
ENSG00000128322	1.57366	0.0204505	1.12947	2.00025e-07	IGLL1
ENSG00000128408	1.3157	8.61165e-15	2.70377	1.29542e-67	RIBC2
ENSG00000130558	2.95998	7.8905e-09	1.94928	8.2746e-16	OLFM1
ENSG00000131203	1.90396	0.000121234	1.16299	2.7788e-05	IDO1
ENSG00000132016	1.55518	5.21311e-09	2.49246	1.53e-90	BRME1
ENSG00000132185	1.53318	0.000643092	1.25211	8.77784e-08	FCRLA
ENSG00000132972	2.07772	2.12357e-05	1.32659	1.19573e-13	RNF17
ENSG00000136492	1.11326	4.76192e-14	1.29361	1.49397e-37	BRIP1
ENSG00000137310	1.3193	1.47414e-16	1.23232	8.4164e-39	TCF19
ENSG00000141639	1.80618	0.00486742	1.78207	3.58736e-09	MAPK4
ENSG00000142700	2.04429	7.10782e-05	2.46197	1.23747e-09	DMRTA2
ENSG00000142973	1.46583	0.00808283	1.13231	0.000624184	CYP4B1
ENSG00000144908	1.03789	0.0323214	1.45287	8.94892e-07	ALDH1L1
ENSG00000145088	1.18541	3.4197e-07	1.05268	8.62963e-21	EAF2
ENSG00000145113	1.65583	1.03328e-10	1.86332	5.05916e-08	MUC4
ENSG00000146285	1.07924	0.00601669	1.43123	6.30677e-11	SCML4
ENSG00000147889	2.55366	3.05916e-27	2.31361	3.64539e-15	CDKN2A
ENSG00000149243	2.3954	1.7703e-15	2.88627	1.09714e-39	KLHL35
ENSG00000150750	1.70239	0.00328894	2.507	9.7735e-19	C11orf53
ENSG00000151164	1.97459	1.36204e-20	2.59863	2.94867e-125	RAD9B
ENSG00000153132	1.17777	0.0174293	3.66151	5.33624e-36	CLGN
ENSG00000154760	1.06226	0.00224536	2.15501	6.1361e-40	SLFN13
ENSG00000155428	1.03288	0.00308984	2.07133	3.25687e-27	TRIM74
ENSG00000156414	2.19062	5.96862e-11	4.72954	3.06266e-97	TDRD9
ENSG00000156738	1.4294	0.00488064	2.19226	1.50462e-11	MS4A1
ENSG00000156959	2.59688	0.00132278	3.13128	1.05578e-12	LHFPL4
ENSG00000157060	6.24767	6.53444e-11	6.63868	1.58802e-73	SHCBP1L
ENSG00000158806	1.02475	0.00287235	1.25248	3.03145e-08	NPM2
ENSG00000159387	1.43833	0.0121982	2.4966	7.02617e-14	IRX6
ENSG00000160654	1.02185	0.00452508	1.03189	9.58818e-08	CD3G
ENSG00000160683	1.18999	0.0146855	1.79375	2.60673e-10	CXCR5
ENSG00000161509	2.52519	1.14383e-10	2.68019	7.07052e-47	GRIN2C
ENSG00000161860	1.49774	1.5084e-06	3.48814	3.22325e-120	SYCE2
ENSG00000162009	2.55774	0.000164764	1.48107	4.69877e-06	SSTR5
ENSG00000162438	1.65812	1.84693e-05	1.05605	1.16303e-06	CTRC
ENSG00000162639	1.04551	4.1309e-08	1.1168	2.93881e-18	HENMT1
ENSG00000163239	2.30645	8.0168e-05	4.37907	1.52043e-112	TDRD10
ENSG00000163354	1.12593	7.1847e-05	1.31061	1.55002e-13	DCST2
ENSG00000163518	1.14411	0.01403	2.80718	1.58214e-20	FCRL4
ENSG00000163793	1.49262	0.0899096	1.316	3.84478e-09	DNAJC5G
ENSG00000163918	1.06221	7.18701e-11	1.05745	2.23228e-22	RFC4
ENSG00000164236	1.52665	0.000348047	1.30653	1.75562e-11	ANKRD33B
ENSG00000164303	2.04832	0.00030187	3.47697	1.41263e-30	ENPP6
ENSG00000164438	1.01462	0.0454383	2.82108	3.71667e-06	TLX3
ENSG00000164900	3.23692	0.000313042	7.34718	5.54083e-91	GBX1
ENSG00000165071	1.93568	6.86051e-07	1.58591	3.67296e-20	TMEM71
ENSG00000165181	2.78691	1.74784e-16	1.51291	2.18595e-25	SHOC1
ENSG00000165891	1.41767	5.2639e-11	1.10277	2.2187e-18	E2F7
ENSG00000166211	5.37228	0.00217307	3.01414	2.63935e-16	SPIC
ENSG00000166796	1.10701	1.12684e-06	2.48958	5.52567e-15	LDHC
ENSG00000167077	2.82722	9.00219e-09	3.92503	1.29696e-104	MEI1
ENSG00000167286	1.23499	0.00102829	1.04391	3.30362e-08	CD3D
ENSG00000167513	1.02728	2.74111e-09	1.0447	1.15638e-21	CDT1
ENSG00000167550	1.07442	2.29108e-07	1.02046	6.24503e-14	RHEBL1
ENSG00000167633	1.03329	0.00388869	1.52074	2.16125e-07	KIR3DL1
ENSG00000167895	1.12428	4.63936e-05	1.16792	2.81368e-17	TMC8
ENSG00000167916	2.82924	7.71544e-08	1.26995	0.00281674	KRT24
ENSG00000168070	2.62845	2.38747e-08	4.71499	8.17303e-51	MAJIN
ENSG00000168131	1.04325	0.0912531	1.51797	0.000648875	OR2B2
ENSG00000169900	3.85803	0.00439104	2.84903	2.65184e-14	PYDC1
ENSG00000169918	1.64121	6.66614e-08	1.22844	1.20837e-13	OTUD7A
ENSG00000170128	1.30227	4.69826e-09	1.79268	4.78315e-13	GPR25
ENSG00000172724	2.04828	1.345e-07	1.60895	1.1469e-08	CCL19
ENSG00000174123	1.03382	0.00383505	2.14138	7.20637e-24	TLR10
ENSG00000174226	1.24967	0.000238713	1.03181	0.000690645	SNX31
ENSG00000174255	1.24249	0.00730344	1.16697	1.61589e-06	ZNF80
ENSG00000174502	4.32507	8.82279e-16	1.19195	1.54022e-05	SLC26A9
ENSG00000174946	1.33471	0.000590924	1.09191	1.8575e-08	GPR171
ENSG00000175170	1.83696	2.00368e-05	1.48868	4.06177e-12	FAM182B
ENSG00000175352	1.83309	4.20101e-09	1.48043	2.5728e-20	NRIP3
ENSG00000175643	1.35057	2.67472e-11	1.41898	6.11138e-37	RMI2
ENSG00000175785	1.81926	4.6763e-05	2.07796	1.32438e-20	PRIMA1
ENSG00000176083	1.51962	7.69987e-09	1.39199	8.16983e-09	ZNF683
ENSG00000176563	1.00726	0.00116317	2.46665	9.95554e-82	CNTD1
ENSG00000176769	1.727	0.0612228	2.35105	5.89842e-13	TCERG1L
ENSG00000176919	1.62169	1.30096e-05	4.8064	5.0822e-115	C8G
ENSG00000178015	2.69694	1.02113e-12	1.51798	1.4267e-19	GPR150
ENSG00000178222	2.30928	6.09579e-08	3.03418	3.23404e-27	RNF212
ENSG00000178226	1.57776	1.32657e-06	1.54732	3.68658e-29	PRSS36
ENSG00000179008	1.4644	0.00714231	3.05127	4.402e-27	C14orf39
ENSG00000179284	1.70113	1.45764e-05	1.13164	6.73595e-08	DAND5
ENSG00000179750	1.03963	0.00181521	1.50172	5.50587e-22	APOBEC3B
ENSG00000179869	2.53583	1.57495e-05	1.30301	4.64194e-07	ABCA13
ENSG00000180264	4.63629	8.09483e-17	1.32403	3.84755e-10	ADGRD2
ENSG00000180929	1.01279	0.00649326	1.8771	1.64997e-21	GPR62
ENSG00000181617	7.46944	6.51995e-08	1.46268	6.07543e-08	FDCSP
ENSG00000182183	1.58005	1.03824e-05	1.32514	4.78144e-12	SHISAL2A
ENSG00000183273	1.77698	7.23052e-09	1.88795	7.32157e-06	CCDC60
ENSG00000183542	1.12049	0.0146999	1.12072	1.34406e-05	KLRC4
ENSG00000184389	1.70666	1.82497e-05	2.50462	5.71795e-39	A3GALT2
ENSG00000186075	6.25098	1.0198e-08	6.12253	2.40609e-45	ZPBP2
ENSG00000186160	1.61742	0.00791004	2.54624	2.75206e-16	CYP4Z1
ENSG00000186204	1.23599	2.36389e-07	2.15232	1.676e-14	CYP4F12
ENSG00000186603	1.05137	0.000301837	1.70888	1.27085e-15	HPDL
ENSG00000186790	2.91662	9.53162e-09	2.8476	9.63223e-21	FOXE3
ENSG00000187140	2.88356	2.25231e-10	2.58911	3.85952e-25	FOXD3
ENSG00000187715	1.7568	0.00356109	2.23684	5.84371e-09	KBTBD12
ENSG00000187821	3.72241	0.0641062	2.08105	0.00406653	HELT
ENSG00000187997	2.29325	4.73782e-08	1.0278	1.17942e-08	C17orf99
ENSG00000188263	4.13398	6.5428e-05	4.70654	3.17847e-40	IL17REL
ENSG00000188822	1.44123	0.000406375	1.7021	7.03762e-12	CNR2
ENSG00000189057	1.39464	8.31308e-16	1.54036	3.28215e-37	FAM111B
ENSG00000189377	1.73681	0.000192677	1.24575	6.51992e-06	CXCL17
ENSG00000196074	4.15419	2.28244e-32	4.55918	5.57978e-102	SYCP2
ENSG00000196155	1.48043	9.35157e-13	1.11266	1.35211e-10	PLEKHG4
ENSG00000196570	3.41181	0.00204464	1.53973	5.99573e-08	PFN3
ENSG00000197721	1.12765	0.0113314	2.2089	2.14347e-19	CR1L
ENSG00000197993	2.25515	0.000390713	4.9512	1.18597e-65	KEL
ENSG00000198821	1.08276	0.000736094	1.05081	2.49773e-09	CD247
ENSG00000198851	1.09502	0.00157312	1.05533	2.8423e-09	CD3E
ENSG00000203760	1.18459	2.78263e-05	1.11944	3.08611e-19	CENPW
ENSG00000204219	1.02982	0.000115074	1.19675	2.81673e-12	TCEA3
ENSG00000204475	1.27931	0.000613453	1.37377	5.68033e-12	NCR3
ENSG00000205436	1.30611	0.00188035	2.04157	7.54683e-16	EXOC3L4
ENSG00000205809	1.50383	0.00130211	1.07129	3.75439e-05	KLRC2
ENSG00000213218	3.96744	1.28144e-07	4.17401	6.09515e-18	CSH2
ENSG00000213886	1.48702	0.00134729	2.3261	6.09978e-20	UBD
ENSG00000213889	1.71725	2.4265e-07	1.23815	8.0954e-18	PPM1N
ENSG00000214357	1.17516	8.57477e-07	1.45763	9.56715e-38	NEURL1B
ENSG00000214694	1.89821	1.90043e-12	3.06303	1.84368e-57	ARHGEF33
ENSG00000214897	4.7736	0.0366457	2.87778	0.0717602	PNMA6E
ENSG00000221826	3.95699	0.000139932	2.10466	2.41425e-08	PSG3
ENSG00000221887	1.89261	1.74546e-06	3.11636	1.18287e-49	HMSD
ENSG00000225556	1.44563	4.78977e-09	1.01033	7.19016e-11	C2CD4D
ENSG00000227507	1.15364	0.00282253	1.15153	1.309e-10	LTB
ENSG00000240505	1.25992	0.00688208	1.93049	6.73426e-12	TNFRSF13B
ENSG00000242019	1.69422	0.0399331	1.44749	0.000257616	KIR3DL3
ENSG00000248485	1.41986	0.0103791	1.03384	0.000221092	PCP4L1
ENSG00000255819	1.25964	0.00430494	1.2669	5.65024e-08	KLRC4-KLRK1
ENSG00000265203	1.89366	0.000317184	2.22983	1.57312e-13	RBP3
ENSG00000265763	2.01241	1.86678e-07	1.27242	7.70921e-13	ZNF488
ENSG00000267909	3.02296	1.11643e-19	2.56619	2.44353e-21	CCDC177
ENSG00000269404	2.24528	0.00267647	3.74032	4.33292e-29	SPIB
ENSG00000270806	1.69872	0.000615123	1.07296	3.67174e-05	C17orf50
ENSG00000272636	1.62029	4.30487e-05	1.4491	2.78783e-13	DOC2B
ENSG00000274641	1.15992	0.00124296	1.07914	2.42989e-07	H2BC17
ENSG00000275038	1.86234	0.00350745	2.9465	3.41447e-12	ENSG00000275038
ENSG00000004948	-1.04035	0.0140145	-1.01546	5.27801e-06	CALCR
ENSG00000006128	-5.80435	0.0277199	-2.25279	0.00103784	TAC1
ENSG00000007174	-3.0504	3.41227e-10	-1.30464	4.46404e-08	DNAH9
ENSG00000009950	-2.38921	2.63858e-05	-2.17908	1.2299e-13	MLXIPL
ENSG00000011347	-1.29037	0.000169465	-1.51361	9.50509e-15	SYT7
ENSG00000011677	-2.75463	7.33949e-06	-1.39141	1.65652e-10	GABRA3
ENSG00000023839	-2.18546	0.0343031	-1.77625	4.62395e-25	ABCC2
ENSG00000038427	-1.79714	8.24491e-06	-1.10039	3.96278e-07	VCAN
ENSG00000048545	-2.10994	6.61584e-06	-1.74709	1.64336e-13	GUCA1A
ENSG00000050438	-1.25696	0.004182	-1.29225	6.6733e-08	SLC4A8
ENSG00000060709	-2.10625	0.000536483	-1.73144	5.57002e-16	RIMBP2
ENSG00000060982	-2.45962	2.91426e-08	-1.5455	6.06533e-15	BCAT1
ENSG00000064195	-1.21609	0.00836835	-1.70113	2.35588e-17	DLX3
ENSG00000067798	-1.16837	0.0116855	-2.63958	6.10471e-39	NAV3
ENSG00000069188	-1.14134	0.0125227	-1.02201	2.50552e-07	SDK2
ENSG00000070601	-4.68025	8.18146e-08	-1.08487	1.50628e-12	FRMPD1
ENSG00000071909	-1.71384	0.000624027	-1.15359	2.89793e-06	MYO3B
ENSG00000074317	-1.27549	0.02695	-1.94244	1.04211e-14	SNCB
ENSG00000077274	-2.23429	1.27779e-05	-1.97589	0.000161013	CAPN6
ENSG00000078579	-9.30788	0.000128081	-1.3464	1.88301e-05	FGF20
ENSG00000080166	-4.60963	3.27824e-25	-3.28107	0.00857353	DCT
ENSG00000080618	-1.74338	0.000223973	-1.09626	0.00059133	CPB2
ENSG00000081818	-1.01978	0.0144278	-1.41133	3.89261e-12	PCDHB4
ENSG00000081842	-2.75041	2.267e-05	-1.08503	0.00978283	PCDHA6
ENSG00000081853	-1.32565	0.000103582	-1.40262	3.75694e-14	PCDHGA2
ENSG00000084710	-2.66833	6.19716e-12	-1.53172	7.73549e-14	EFR3B
ENSG00000089225	-3.67287	1.81943e-11	-2.52343	1.13421e-11	TBX5
ENSG00000089472	-2.30817	2.74623e-08	-1.16969	1.31129e-11	HEPH
ENSG00000099625	-1.53283	5.91574e-06	-1.56333	2.10454e-38	CBARP
ENSG00000099937	-3.11004	0.00039474	-1.32346	1.17274e-05	SERPIND1
ENSG00000100191	-1.40837	3.97802e-05	-1.43312	4.14853e-06	SLC5A4
ENSG00000100341	-4.56999	3.85617e-06	-2.46673	3.63069e-08	PNPLA5
ENSG00000100604	-4.68524	1.16461e-17	-3.90222	5.22579e-24	CHGA
ENSG00000101076	-2.42161	0.00821645	-1.4279	3.9146e-05	HNF4A
ENSG00000101282	-2.86054	1.66556e-05	-1.43218	2.73029e-10	RSPO4
ENSG00000101349	-1.72635	0.0474073	-1.09916	2.54233e-05	PAK5
ENSG00000101680	-2.05569	0.000275916	-1.60121	8.74436e-10	LAMA1
ENSG00000102230	-1.83907	0.00116736	-2.11668	6.0598e-13	PCYT1B
ENSG00000102891	-7.0328	1.62041e-09	-4.07744	3.82826e-07	MT4
ENSG00000103056	-1.21131	0.00174417	-1.27136	1.74526e-09	SMPD3
ENSG00000103449	-3.67843	1.64747e-15	-2.28153	8.22948e-18	SALL1
ENSG00000103742	-1.77541	4.44257e-08	-1.08416	1.34518e-08	IGDCC4
ENSG00000105251	-1.51927	2.22117e-05	-1.04851	2.31198e-05	SHD
ENSG00000105696	-2.99234	3.47345e-08	-1.63883	1.01776e-09	TMEM59L
ENSG00000105737	-2.95541	1.73548e-20	-1.00724	0.00102327	GRIK5
ENSG00000106178	-2.4835	0.0449642	-1.39876	1.77974e-10	CCL24
ENSG00000106236	-2.29551	6.35458e-05	-1.8258	1.93261e-13	NPTX2
ENSG00000106536	-2.65757	0.00302823	-2.23602	1.4139e-08	POU6F2
ENSG00000106809	-2.32503	0.0234902	-1.53106	6.50275e-06	OGN
ENSG00000107165	-3.4504	7.88236e-07	-2.21823	5.50821e-10	TYRP1
ENSG00000107984	-2.3943	0.0906954	-1.99162	8.27067e-14	DKK1
ENSG00000108684	-3.25115	3.93616e-07	-1.18098	1.41327e-05	ASIC2
ENSG00000108947	-3.45111	5.0974e-18	-2.04881	6.67809e-27	EFNB3
ENSG00000110092	-1.67236	4.82689e-06	-1.866	1.28119e-26	CCND1
ENSG00000111087	-1.88909	1.49542e-06	-2.36567	2.30154e-24	GLI1
ENSG00000111218	-1.99305	0.000142715	-3.61095	1.21914e-31	PRMT8
ENSG00000112175	-3.87585	7.75062e-06	-1.17153	0.0157396	BMP5
ENSG00000112852	-3.25904	1.6376e-09	-1.3834	1.04037e-08	PCDHB2
ENSG00000113209	-2.53108	6.14919e-09	-2.72015	4.48653e-23	PCDHB5
ENSG00000113211	-2.49152	4.34037e-07	-1.59638	8.4421e-08	PCDHB6
ENSG00000114200	-1.42482	0.0087823	-2.90108	1.54794e-33	BCHE
ENSG00000114923	-1.03906	0.00395424	-1.39226	6.76291e-24	SLC4A3
ENSG00000115386	-4.68671	0.053099	-3.2905	3.21019e-13	REG1A
ENSG00000115758	-2.32663	1.27666e-16	-1.11835	5.33014e-08	ODC1
ENSG00000115844	-3.20698	0.0503886	-2.59434	1.83587e-30	DLX2
ENSG00000116183	-2.4283	1.20413e-09	-2.59606	3.11622e-21	PAPPA2
ENSG00000117122	-1.20028	0.000212397	-1.32525	1.23647e-17	MFAP2
ENSG00000120149	-4.11447	3.56131e-21	-2.62626	5.95289e-54	MSX2
ENSG00000120251	-4.59526	7.14545e-13	-1.0926	0.0170183	GRIA2
ENSG00000120669	-2.37693	6.95232e-06	-2.35594	1.42511e-26	SOHLH2
ENSG00000122121	-3.39198	5.94992e-09	-1.21551	6.65394e-11	XPNPEP2
ENSG00000122133	-5.56104	0.00458248	-3.82624	1.13081e-35	PAEP
ENSG00000122136	-4.34297	1.45115e-14	-1.03258	7.48534e-08	OBP2A
ENSG00000123405	-2.79299	1.28993e-09	-1.83718	6.09385e-18	NFE2
ENSG00000123407	-3.49797	0.00112076	-1.26352	1.80362e-08	HOXC12
ENSG00000124818	-1.17444	0.0261708	-1.2873	0.00037408	OPN5
ENSG00000125675	-1.16322	0.000948183	-1.89594	3.31378e-15	GRIA3
ENSG00000126733	-2.88428	1.29569e-10	-1.5856	1.42405e-08	DACH2
ENSG00000126970	-2.51961	4.27104e-12	-1.45239	1.1776e-16	ZC4H2
ENSG00000128285	-2.12981	1.9146e-07	-1.65258	1.37202e-11	MCHR1
ENSG00000128342	-1.16485	0.00669642	-1.28532	1.77081e-09	LIF
ENSG00000128655	-2.13243	3.15236e-05	-1.4087	9.28438e-10	PDE11A
ENSG00000129951	-5.0198	2.7167e-22	-1.58077	4.20934e-10	PLPPR3
ENSG00000131620	-1.35479	0.0990652	-1.70267	4.53747e-14	ANO1
ENSG00000131969	-4.43474	8.17561e-24	-1.62948	3.7636e-10	ABHD12B
ENSG00000132854	-3.42377	7.74068e-08	-1.47163	1.99058e-23	KANK4
ENSG00000133019	-1.36271	0.0377451	-1.45592	1.43401e-06	CHRM3
ENSG00000134365	-1.68562	0.0550545	-1.629	2.04067e-09	CFHR4
ENSG00000135298	-2.9737	4.4187e-07	-1.00905	0.000599292	ADGRB3
ENSG00000136274	-1.25244	0.000239656	-1.46639	3.49016e-16	NACAD
ENSG00000136352	-5.72199	1.35129e-06	-1.39065	0.000195559	NKX2-1
ENSG00000137674	-1.16103	0.0124159	-2.3883	1.41272e-12	MMP20
ENSG00000138792	-1.45243	7.73876e-06	-1.04722	5.87219e-13	ENPEP
ENSG00000139209	-2.87369	1.24623e-07	-1.73686	1.08664e-14	SLC38A4
ENSG00000139915	-3.25621	1.84461e-06	-2.69845	0.000147163	MDGA2
ENSG00000139971	-1.53708	1.34413e-06	-1.10851	8.24918e-12	ARMH4
ENSG00000140522	-2.07975	0.000467509	-2.03121	1.0974e-05	RLBP1
ENSG00000140557	-3.31799	4.45296e-08	-1.19281	4.30853e-07	ST8SIA2
ENSG00000140795	-2.62064	1.42356e-07	-1.32459	3.74171e-08	MYLK3
ENSG00000140807	-6.20856	2.63413e-68	-1.77866	2.92882e-16	NKD1
ENSG00000141756	-1.55391	2.97486e-05	-1.09282	3.86774e-09	FKBP10
ENSG00000142549	-3.64935	0.00829575	-2.01889	1.15275e-21	IGLON5
ENSG00000143171	-5.51742	1.96754e-31	-2.21367	1.1065e-13	RXRG
ENSG00000143512	-1.95489	0.000152596	-1.96084	9.42073e-08	HHIPL2
ENSG00000144278	-2.05314	0.000219167	-2.91032	6.38205e-28	GALNT13
ENSG00000144355	-3.59327	0.00112702	-2.35062	4.18584e-38	DLX1
ENSG00000144406	-2.10308	5.17257e-06	-1.08326	0.030863	UNC80
ENSG00000146166	-3.62868	1.07144e-05	-2.76491	7.39552e-08	LGSN
ENSG00000147246	-1.98963	0.0413474	-3.23024	6.91911e-15	HTR2C
ENSG00000147255	-1.34161	0.0263609	-1.05708	6.10277e-06	IGSF1
ENSG00000147588	-4.55923	0.040135	-1.19977	1.6996e-05	PMP2
ENSG00000148123	-2.88863	0.00130762	-2.17099	2.85482e-08	PLPPR1
ENSG00000148942	-2.05653	0.0006287	-2.03112	2.05864e-13	SLC5A12
ENSG00000149948	-1.33959	0.0192891	-2.92764	3.69136e-33	HMGA2
ENSG00000149972	-1.06054	0.0630996	-1.08793	2.68585e-06	CNTN5
ENSG00000150244	-5.20985	0.00375476	-2.82514	0.0511617	TRIM48
ENSG00000150625	-1.26866	0.0107816	-1.35821	0.0877499	GPM6A
ENSG00000150893	-2.64117	0.000892943	-1.91854	8.04913e-09	FREM2
ENSG00000151012	-1.15449	0.00386616	-2.53046	8.57555e-25	SLC7A11
ENSG00000151640	-2.34317	5.12857e-08	-1.23019	4.18262e-07	DPYSL4
ENSG00000151834	-4.79891	6.76055e-11	-1.82707	0.00420257	GABRA2
ENSG00000152086	-3.85711	0.000169127	-3.57932	0.000156475	TUBA3E
ENSG00000152822	-1.12686	0.00474205	-3.08049	9.18598e-06	GRM1
ENSG00000152910	-1.96166	0.00100998	-1.02093	0.000363273	CNTNAP4
ENSG00000152953	-2.53338	1.87101e-08	-1.72636	1.14024e-16	STK32B
ENSG00000153707	-3.43109	4.04889e-11	-2.09941	2.74166e-16	PTPRD
ENSG00000154646	-7.57238	6.02174e-06	-3.66487	1.93699e-08	TMPRSS15
ENSG00000154736	-1.4238	0.000215499	-1.03079	3.52612e-07	ADAMTS5
ENSG00000154856	-2.34359	1.69426e-15	-1.17542	1.9882e-13	APCDD1
ENSG00000155511	-2.00898	0.000242175	-2.726	1.02419e-09	GRIA1
ENSG00000155622	-6.99295	0.000533948	-4.04646	0.00636493	XAGE2
ENSG00000155816	-3.99932	1.71332e-09	-1.58818	3.31368e-07	FMN2
ENSG00000156009	-6.41491	2.6498e-11	-2.63687	0.0621466	MAGEA8
ENSG00000156076	-3.83096	3.89051e-08	-1.84298	2.39257e-10	WIF1
ENSG00000156103	-2.31025	7.71563e-10	-1.43827	9.40327e-13	MMP16
ENSG00000156269	-2.47109	0.0143416	-4.11086	0.000127766	NAA11
ENSG00000156510	-1.85646	0.000834851	-2.53634	1.76577e-18	HKDC1
ENSG00000157152	-4.33768	0.00886757	-1.92776	1.34712e-10	SYN2
ENSG00000157680	-1.14172	0.000197334	-1.75465	6.83629e-16	DGKI
ENSG00000159337	-3.69728	4.48849e-05	-2.20321	1.22528e-10	PLA2G4D
ENSG00000159650	-1.34104	0.0483869	-1.64561	0.00196881	UROC1
ENSG00000160181	-2.33845	0.00270402	-1.70764	0.000439056	TFF2
ENSG00000160801	-1.57023	1.40602e-05	-1.18542	7.17087e-07	PTH1R
ENSG00000160963	-5.65083	4.28116e-40	-1.28183	0.00332815	COL26A1
ENSG00000161681	-2.46091	7.71522e-09	-1.38563	8.71338e-12	SHANK1
ENSG00000162344	-8.52695	6.93028e-23	-3.27753	5.32629e-15	FGF19
ENSG00000162543	-1.00697	0.0613701	-1.25136	1.78992e-06	UBXN10
ENSG00000162598	-1.72779	0.0571208	-1.37906	0.0130258	C1orf87
ENSG00000162641	-1.01183	0.0230502	-2.24494	1.45556e-23	AKNAD1
ENSG00000162849	-1.36738	5.81104e-05	-1.05412	2.18003e-10	KIF26B
ENSG00000162975	-3.85693	4.56512e-11	-1.20305	7.39281e-25	KCNF1
ENSG00000163083	-2.04229	1.04438e-05	-2.02716	1.54434e-27	INHBB
ENSG00000163285	-1.59614	0.0422001	-1.2298	0.0266107	GABRG1
ENSG00000163286	-5.95137	2.08713e-10	-1.1755	0.0256354	ALPG
ENSG00000163288	-1.3519	0.0330877	-1.06917	0.0242604	GABRB1
ENSG00000163395	-2.46186	5.32378e-06	-1.67192	1.77878e-14	IGFN1
ENSG00000163530	-1.85984	0.0928343	-4.13109	4.00555e-08	DPPA2
ENSG00000163618	-1.54551	0.000971509	-1.0227	0.000148559	CADPS
ENSG00000163623	-1.74399	0.011009	-1.47131	1.64896e-09	NKX6-1
ENSG00000163817	-1.42885	0.0319565	-2.31456	1.44149e-17	SLC6A20
ENSG00000164161	-2.47777	7.65512e-05	-2.50112	1.13422e-10	HHIP
ENSG00000164532	-1.45577	0.065284	-1.35626	0.0351644	TBX20
ENSG00000164627	-2.19896	8.05602e-06	-1.37651	8.58614e-11	KIF6
ENSG00000164638	-2.90114	3.37011e-12	-1.22848	4.57655e-09	SLC29A4
ENSG00000164796	-2.30437	0.000588829	-1.97834	6.19227e-25	CSMD3
ENSG00000165023	-4.42234	1.75973e-07	-2.75304	5.08004e-11	DIRAS2
ENSG00000165495	-3.62205	2.64406e-13	-1.00961	1.37846e-15	PKNOX2
ENSG00000165556	-4.6011	2.05167e-10	-4.04599	5.55184e-22	CDX2
ENSG00000165617	-1.07116	0.0047622	-1.72601	2.65e-15	DACT1
ENSG00000165828	-2.93696	0.000406362	-1.48901	1.5259e-06	PRAP1
ENSG00000165863	-4.99562	1.29061e-08	-2.16969	3.87974e-26	C10orf82
ENSG00000165868	-1.57966	1.44816e-06	-2.22948	1.43852e-41	HSPA12A
ENSG00000165905	-1.16097	8.856e-05	-1.29821	3.43097e-19	LARGE2
ENSG00000166268	-1.05028	0.000583148	-1.43093	2.53103e-08	MYRFL
ENSG00000166558	-2.92295	0.000677925	-1.37447	3.28643e-09	SLC38A8
ENSG00000166924	-1.27431	0.000817276	-1.78172	1.35419e-15	NYAP1
ENSG00000166963	-1.11106	0.00051724	-1.23453	1.23275e-10	MAP1A
ENSG00000167244	-2.66868	3.37141e-10	-1.15719	3.87066e-07	IGF2
ENSG00000167419	-2.88964	1.14188e-08	-5.47962	1.54282e-08	LPO
ENSG00000168065	-2.49733	8.58432e-07	-1.26894	0.00129731	SLC22A11
ENSG00000168135	-2.86786	6.59772e-05	-1.41212	0.0247151	KCNJ4
ENSG00000168671	-2.39651	1.402e-05	-2.13454	8.3769e-07	UGT3A2
ENSG00000168754	-1.84796	0.00036413	-1.15985	0.0373839	FAM178B
ENSG00000168843	-2.04418	0.00321882	-2.57063	7.28863e-18	FSTL5
ENSG00000169432	-1.21562	0.0240118	-1.91015	9.84008e-15	SCN9A
ENSG00000169688	-2.66082	0.0013003	-1.12378	0.0425704	MT1B
ENSG00000170367	-3.66458	1.6862e-07	-5.89016	0.00427157	CST5
ENSG00000170373	-4.41277	5.5805e-08	-2.79123	1.17215e-05	CST1
ENSG00000170558	-2.32586	1.88106e-05	-1.67824	6.40038e-10	CDH2
ENSG00000170891	-1.87828	1.23366e-05	-1.05254	1.47403e-08	CYTL1
ENSG00000170927	-1.09395	0.0782374	-2.48851	1.59853e-12	PKHD1
ENSG00000171431	-7.49822	9.98873e-06	-3.16454	0.00210346	KRT20
ENSG00000171446	-5.63151	2.31544e-13	-1.12044	0.0294034	KRT27
ENSG00000171509	-1.24441	0.000615445	-2.63059	8.8353e-07	RXFP1
ENSG00000171533	-1.20589	0.00122745	-1.30615	3.96278e-07	MAP6
ENSG00000171951	-1.73329	0.000160609	-1.75119	7.95127e-18	SCG2
ENSG00000172000	-1.17508	0.0201512	-1.50087	1.21494e-11	ZNF556
ENSG00000172020	-2.66849	1.10865e-08	-2.20485	2.73862e-16	GAP43
ENSG00000172551	-1.93727	0.037826	-5.96008	3.37789e-50	MUCL1
ENSG00000172638	-1.3329	6.61584e-06	-1.01128	4.89496e-10	EFEMP2
ENSG00000172782	-1.13339	0.0548991	-1.35815	1.40088e-05	FADS6
ENSG00000172889	-1.39697	9.89167e-07	-1.08662	3.38277e-12	EGFL7
ENSG00000172969	-1.90797	0.00404597	-1.62576	0.0234679	FRG2C
ENSG00000173157	-1.48205	0.0482398	-2.28652	6.50367e-13	ADAMTS20
ENSG00000174599	-2.6617	5.48508e-10	-1.42004	5.16921e-12	TRAM1L1
ENSG00000174899	-2.84798	1.87688e-05	-1.31387	4.4766e-06	SLC66A1L
ENSG00000176428	-2.45928	1.52595e-10	-1.12636	4.37337e-08	VPS37D
ENSG00000176490	-1.15771	0.0195575	-1.10629	1.29514e-05	DIRAS1
ENSG00000176746	-1.77002	0.0982702	-5.1845	1.75798e-15	MAGEB6
ENSG00000178235	-1.41267	0.0686042	-3.1093	0.00987524	SLITRK1
ENSG00000178538	-3.83538	2.31149e-08	-1.05518	4.32104e-07	CA8
ENSG00000178602	-2.82072	0.00610102	-3.82117	2.21192e-07	OTOS
ENSG00000179071	-1.73743	3.24405e-06	-1.66581	4.45038e-14	CCDC89
ENSG00000179542	-1.29604	0.0343105	-1.39452	3.23163e-07	SLITRK4
ENSG00000180347	-1.7664	0.0289526	-1.98416	3.38399e-05	ITPRID1
ENSG00000180772	-3.45324	0.0103361	-1.0876	0.0175323	AGTR2
ENSG00000182168	-2.49202	2.33329e-11	-1.06867	2.63948e-06	UNC5C
ENSG00000182583	-1.37267	0.0093887	-3.28698	1.02617e-12	VCX
ENSG00000182898	-5.49494	0.00780009	-6.44148	1.44425e-52	TCHHL1
ENSG00000183098	-1.57992	0.000354371	-1.35652	6.96019e-09	GPC6
ENSG00000183114	-1.08426	0.0139062	-2.45964	2.53396e-22	FAM43B
ENSG00000183654	-5.78131	0.000179766	-2.74269	0.00445699	MARCHF11
ENSG00000183715	-2.69581	4.22575e-08	-2.08459	1.30706e-05	OPCML
ENSG00000184160	-2.25993	9.52866e-08	-1.18068	1.80387e-07	ADRA2C
ENSG00000184613	-2.13385	1.47428e-05	-2.02971	1.75519e-17	NELL2
ENSG00000184697	-5.41842	1.60926e-27	-3.19122	8.27055e-08	CLDN6
ENSG00000184984	-3.54074	5.14213e-36	-1.5176	1.26055e-09	CHRM5
ENSG00000185247	-1.24459	0.0666187	-4.7301	2.98622e-36	MAGEA11
ENSG00000185269	-6.8051	1.19427e-37	-1.27641	0.0455244	NOTUM
ENSG00000185818	-4.55917	3.19272e-20	-1.25148	2.8517e-12	NAT8L
ENSG00000185899	-1.18808	0.0502601	-1.98409	3.05187e-10	TAS2R60
ENSG00000186310	-1.41961	0.00013639	-1.04116	1.89671e-06	NAP1L3
ENSG00000186462	-2.74944	8.54787e-12	-1.25007	6.69122e-17	NAP1L2
ENSG00000186732	-2.26786	0.00912256	-1.63016	3.45347e-07	MPPED1
ENSG00000187268	-1.90632	7.13317e-08	-3.68522	0.00181405	FAM9C
ENSG00000187908	-2.10285	0.0253381	-2.72458	4.72865e-11	DMBT1
ENSG00000188133	-1.21688	0.0232268	-1.7355	1.40943e-05	TMEM215
ENSG00000188488	-1.29335	0.0212826	-1.8611	1.6379e-06	SERPINA5
ENSG00000188580	-1.06663	0.067775	-1.97396	2.17487e-11	NKAIN2
ENSG00000196109	-2.46874	1.28239e-05	-1.06431	0.000850393	ZNF676
ENSG00000196767	-2.01885	0.0488665	-1.62091	0.0255194	POU3F4
ENSG00000196917	-1.15059	0.0291585	-1.52788	5.01343e-09	HCAR1
ENSG00000197415	-1.08414	0.029053	-1.22267	1.63458e-07	VEPH1
ENSG00000197479	-2.46149	1.35524e-08	-1.02119	2.60229e-05	PCDHB11
ENSG00000197635	-1.50748	0.00282305	-1.85497	1.03618e-16	DPP4
ENSG00000197653	-3.47375	1.75055e-22	-1.11761	5.60154e-07	DNAH10
ENSG00000198216	-4.05874	9.73049e-11	-1.06865	4.17215e-05	CACNA1E
ENSG00000198300	-2.85279	2.30364e-12	-1.07828	9.60567e-07	PEG3
ENSG00000198354	-2.51531	3.02025e-05	-2.20607	1.27482e-06	DCAF12L2
ENSG00000198797	-4.53163	7.46129e-08	-1.15705	0.000468262	BRINP2
ENSG00000198930	-1.42534	0.068037	-2.48402	1.00335e-15	CSAG1
ENSG00000198948	-1.53538	0.000127972	-1.21301	2.60794e-10	MFAP3L
ENSG00000203727	-1.30973	0.00456184	-1.31544	2.15869e-08	SAMD5
ENSG00000204065	-2.84815	3.90239e-06	-2.11406	1.01484e-08	TCEAL5
ENSG00000204361	-4.95522	2.00636e-06	-2.25841	3.80566e-10	NXPE2
ENSG00000204542	-5.20969	6.39485e-06	-2.45673	9.23573e-24	C6orf15
ENSG00000204740	-3.62291	0.0509711	-1.64266	3.48216e-09	MALRD1
ENSG00000204909	-1.45578	0.00465569	-3.0187	1.45156e-07	SPINK9
ENSG00000205002	-1.81132	0.00568502	-1.11012	5.47148e-05	AARD
ENSG00000205362	-3.35201	4.81897e-09	-1.32967	7.12589e-07	MT1A
ENSG00000212901	-4.69285	1.5715e-06	-2.42369	0.000974874	KRTAP3-1
ENSG00000213023	-1.6044	0.00201479	-1.11184	2.35626e-05	SYT3
ENSG00000213996	-2.25256	1.52722e-09	-1.06615	8.43052e-08	TM6SF2
ENSG00000214189	-2.03057	1.94791e-07	-1.37597	1.19812e-12	ZNF788P
ENSG00000214415	-6.28092	3.66662e-07	-2.5237	0.0100595	GNAT3
ENSG00000214652	-3.77716	9.698e-11	-1.05791	0.000625814	ZNF727
ENSG00000215018	-1.94898	9.61034e-05	-2.66686	2.28061e-22	COL28A1
ENSG00000225899	-1.8503	0.0389012	-1.89062	0.00154629	FRG2B
ENSG00000229314	-1.14462	0.0687601	-1.86465	3.59398e-08	ORM1
ENSG00000232040	-2.07913	0.00132579	-2.20117	7.4089e-15	ZBED9
ENSG00000232237	-4.44448	4.57505e-12	-1.10313	8.57093e-07	ASCL5
ENSG00000240563	-1.48369	1.19955e-05	-1.20353	1.89833e-09	L1TD1
ENSG00000243284	-5.0171	8.68991e-07	-2.50638	3.38522e-24	VSIG8
ENSG00000244355	-8.15831	4.18944e-30	-1.80403	0.00234717	LY6G6D
ENSG00000249992	-1.09064	0.00461824	-1.55978	8.19578e-20	TMEM158
ENSG00000250641	-7.3796	8.80457e-27	-1.8125	0.000336781	LY6G6F-LY6G6D
ENSG00000253305	-1.05169	0.000980793	-1.32691	3.46529e-10	PCDHGB6
ENSG00000253846	-1.56767	0.00102337	-1.11264	1.10283e-06	PCDHGA10
ENSG00000254221	-2.51402	4.48073e-05	-3.05581	2.69024e-28	PCDHGB1
ENSG00000254245	-1.52782	0.000155492	-1.8702	7.36667e-16	PCDHGA3
ENSG00000254585	-2.42298	4.46928e-08	-1.35473	8.36699e-08	MAGEL2
ENSG00000255552	-4.12099	1.5847e-11	-1.67657	3.63601e-05	LY6G6E
ENSG00000256029	-1.61724	0.00106437	-1.53659	6.37739e-05	ENSG00000256029
ENSG00000256394	-1.75664	0.0346526	-1.32801	0.00162733	ASIC5
ENSG00000258947	-1.42503	0.000585414	-1.71037	4.67121e-25	TUBB3
ENSG00000259803	-2.14095	0.000242793	-1.79673	8.7094e-06	SLC22A31
ENSG00000259823	-5.89342	0.00774824	-2.86268	2.05492e-12	LYPD8
ENSG00000261649	-1.15961	0.020461	-3.80809	1.28332e-12	GOLGA6L7
ENSG00000262655	-2.68937	1.02262e-08	-1.34639	6.40646e-11	SPON1
ENSG00000269964	-2.668	0.00687253	-2.85254	9.38007e-13	MEI4
ENSG00000273706	-4.77493	5.95954e-10	-3.58839	4.62611e-33	LHX1
ENSG00000280571	-1.4791	3.39824e-05	-1.16589	1.97189e-05	ENSG00000280571
