# Supplementary material for: Human Papillomavirus 42 Drives Digital Papillary Adenocarcinoma and Elicits a Germ Cell–like Program Conserved in HPV-Positive Cancers
Source: Cancer Discov. 2022 Oct 10;13(1):70–84. doi: 10.1158/2159-8290.CD-22-0489 (PMC9827110; doi:10.1158/2159-8290.CD-22-0489)
Supplement: Supplementary Table S13 — HPV42 genome sequence comparison. [file cd-22-0489_supplementary_table_s13_suppst13.xlsx]

## Sheet: Supplementary Table S13
Supplementary Table S13: Sequence comparison of HPV42 consensus genomes
Sample ID	HPV42 genome covered (DNA/RNA) [%]	HPV42 genome identity (DNA/RNA consensus) [%]	HPV42 genome covered (DNA/HPV42 PaVE reference) [%]	HPV42 genome identify (DNA/HPV42 PaVE reference) [%]
#168	87	100	91	99.69
#184	100	100	100	99.47
#185	100	99.99	100	99.48
#170	100	99.73	100	99.49
#181	74	97.56	100	99.49
#176	93	100	93	99.46
#177	10	100	31	97.71
#178	92	99.15	90	99.41
#191	NA	NA	100	99.51
#169	100	100	100	99.53
#171	36	99.85	100	99.53
#182	100	100	100	99.55
#179	100	100	100	99.56
#188	100	99.97	100	99.56
#180	100	99.28	100	99.58
#173	100	99.99	100	99.62
