# Supplementary material for: Human Papillomavirus 42 Drives Digital Papillary Adenocarcinoma and Elicits a Germ Cell–like Program Conserved in HPV-Positive Cancers
Source: Cancer Discov. 2022 Oct 10;13(1):70–84. doi: 10.1158/2159-8290.CD-22-0489 (PMC9827110; doi:10.1158/2159-8290.CD-22-0489)
Supplement: Supplementary Table S14 — HPV42 genome structural variants. [file cd-22-0489_supplementary_table_s14_suppst14.xlsx]

## Sheet: Supplementary Table S14
Supplementary Table S14: Structural variants detected within the HPV42 genome
Sample ID	CHROM_A	START_A	END_A	CHROM_B	START_B	END_B	TYPE	Spanning Read Pairs [REF]	Spanning Read Pairs[ALT]	Split-reads [REF]	Split-Reads [ALT]
#169	HPV42	2582	2584	HPV42	3090	3091	DEL	99	1	312	19
#170	HPV42	1955	1960	HPV42	2442	2447	DUP	154	114	337	138
#170	HPV42	2420	2421	HPV42	4359	4360	DEL	48	2	145	1
#177	HPV42	1386	1388	HPV42	1455	1456	DEL	0		8	5
#178	HPV42	1279	1282	HPV42	5366	5369	DUP	4	3	33	14
#178	HPV42	1477	1480	HPV42	5995	5998	DEL	12	4	47	15
#181	HPV42	350	353	HPV42	1849	1852	DUP	114	38	336	69
#181	HPV42	2695	2701	HPV42	3416	3417	DEL	73	22	222	79
#181	HPV42	4357	4361	HPV42	4432	4436	DUP	50	5	238	6
#188	HPV42	694	697	HPV42	6551	6554	DEL	6	2	130	11
#188	HPV42	2455	2459	HPV42	6599	6600	BND	8		99	2
#188	HPV42	2687	2691	HPV42	6375	6379	DEL	1	6	36	29
#188	HPV42	6397	6400	HPV42	6646	6649	DUP	8	4	70	2
#188	HPV42	6596	6600	HPV42	2458	2459	BND	8		99	2
#191	HPV42	1676	1680	HPV42	3463	3464	BND	18	2	81	8
#191	HPV42	3280	3281	HPV42	3332	3333	DEL	49		441	15
#191	HPV42	3460	3464	HPV42	1679	1680	BND	18	2	81	8
#191	HPV42	4468	4470	HPV42	5473	5474	BND	15	2	90	4
#191	HPV42	5472	5474	HPV42	4469	4470	BND	15	2	90	4
